# Supplementary material
Source: MDPI journal article supplement (https://www.mdpi.com/1424-8247/15/5/494)

## Supporting information

### Uracil as a Zn-Binding Bioisostere in the Design of Quinoline-Uracil Hybrids as Anticancer Carbonic Anhydrase Inhibitors.

Samar A. El-Kalyoubi<sup>1</sup>, Ehab S. Taher<sup>2</sup>, Tarek S. Ibrahim<sup>3,4\*</sup>, Mohammed Farrag El-Behairy<sup>5</sup>, Amany M. M. Al-Mahmoudy<sup>4</sup>.

<sup>1</sup>Department of Pharmaceutical Organic Chemistry, Faculty of Pharmacy (Girls), Al-Azhar University, Nasr City, 11651, Cairo, Egypt. SamarEl-kalyoubi.52@azhar.edu.eg

<sup>2</sup>Department of Pharmaceutical Organic Chemistry, Faculty of Pharmacy, Al-Azhar University, Assiut, 71524, Egypt. ehabetaher@azhar.edu.eg

<sup>3</sup>Department of Pharmaceutical Chemistry, Faculty of Pharmacy, King Abdulaziz University, Jeddah, 21589, Saudi Arabia.

<sup>4</sup>Department of Pharmaceutical Organic Chemistry, Faculty of Pharmacy, Zagazig University, Zagazig, 44519, Egypt. amanyma@zu.edu.eg

<sup>5</sup>Department of Organic and Medicinal Chemistry, Faculty of Pharmacy, University of Sadat City, Menoufiya, 32897, Egypt. mohammed.farrag@fop.usc.edu.eg

\* Correspondence: tmabraham@kau.edu.sa (T.S.I.)

Table of Contents:

| Legend                                                                                                                                                                                   | Figure or table number | Page number |
|------------------------------------------------------------------------------------------------------------------------------------------------------------------------------------------|------------------------|-------------|
| <sup>1</sup> H NMR and <sup>13</sup> C NMR spectra of ( <i>E</i> )-6-amino-5-(((2-oxo-1,2-dihydroquinolin-3-yl)methylene)amino)pyrimidine-2,4(1H,3H)-dione (10a)                         | Figure S1              | S3          |
| <sup>1</sup> H NMR and <sup>13</sup> C NMR spectra of ( <i>E</i> )-6-amino-1-benzyl-5-(((2-oxo-1,2-dihydroquinolin-3-yl)methylene)amino)pyrimidine-2,4(1H,3H)-dione (10b)                | Figure S2              | S4          |
| <sup>1</sup> H NMR and <sup>13</sup> C NMR spectra of ( <i>E</i> )-6-amino-1-ethyl-5-(((2-oxo-1,2-dihydroquinolin-3-yl)methylene)amino)pyrimidine-2,4(1H,3H)-dione (10c).                | Figure S3              | S5          |
| <sup>1</sup> H NMR and <sup>13</sup> C NMR spectra of ( <i>E</i> )-6-amino-1-methyl-5-(((2-oxo-1,2-dihydroquinolin-3-yl)methylene)amino)pyrimidine-2,4(1H,3H)-dione (10d).               | Figure S4              | S6          |
| <sup>1</sup> H NMR and <sup>13</sup> C NMR spectra of ( <i>E</i> )-3-(((6-amino-1-methyl-4-oxo-2-thioxo-1,2,3,4-tetrahydropyrimidin-5-yl)imino)methyl) quinolin-2(1H)-one (10e)          | Figure S5              | S7          |
| <sup>1</sup> H NMR and <sup>13</sup> C NMR spectra of ( <i>E</i> )-6-amino-1-ethyl-5-(((8-methyl-2-oxo-1,2-dihydroquinolin-3-yl)methylene)amino) pyrimidine-2,4(1H,3H)-dione (10f)       | Figure S6              | S8          |
| <sup>1</sup> H NMR and <sup>13</sup> C NMR spectra of ( <i>E</i> )-3-(((6-amino-1-methyl-4-oxo-2-thioxo-1,2,3,4-tetrahydropyrimidin-5-yl)imino)methyl)-8-methylquinolin-2(1H)-one (10g)  | Figure S7              | S9          |
| <sup>1</sup> H NMR and <sup>13</sup> C NMR spectra of ( <i>E</i> )-6-amino-5-(((6-methoxy-2-oxo-1,2-dihydroquinolin-3-yl)methylene)amino)pyrimidine-2,4(1H,3H)-dione (10h)               | Figure S8              | S10         |
| <sup>1</sup> H NMR and <sup>13</sup> C NMR spectra of ( <i>E</i> )-6-amino-1-benzyl-5-(((6-methoxy-2-oxo-1,2-dihydroquinolin-3-yl)methylene)amino) pyrimidine-2,4(1H,3H)-dione (10i)     | Figure S9              | S11         |
| <sup>1</sup> H NMR and <sup>13</sup> C NMR spectra of ( <i>E</i> )-6-amino-1-ethyl-5-(((6-methoxy-2-oxo-1,2-dihydroquinolin-3-yl)methylene)amino) pyrimidine-2,4(1H,3H)-dione (10j)      | Figure S10             | S12         |
| <sup>1</sup> H NMR and <sup>13</sup> C NMR spectra of ( <i>E</i> )-6-amino-5-(((6-methoxy-2-oxo-1,2-dihydroquinolin-3-yl)methylene)amino)-1-methyl pyrimidine-2,4(1H,3H)-dione (10k)     | Figure S11             | S13         |
| <sup>1</sup> H NMR and <sup>13</sup> C NMR spectra of ( <i>E</i> )-3-(((6-amino-1-methyl-4-oxo-2-thioxo-1,2,3,4-tetrahydropyrimidin-5-yl)imino)methyl)-6-methoxyquinolin-2(1H)-one (10l) | Figure S12             | S14         |
| 2D & 3D interactions of new compounds with the binding site of the human carbonic anhydrases IX (PDB file 5FL4)                                                                          | Table S1               | S15-S19     |
| Mass spectra for compounds 10a-l                                                                                                                                                         | Table S2               | S19- S22    |

**Figure S1:**  $^1\text{H}$  NMR and  $^{13}\text{C}$  NMR spectra of (*E*)-6-amino-5-(((2-oxo-1,2-dihydroquinolin-3-yl)methylene)amino)pyrimidine-2,4(1H,3H)-dione (10a).

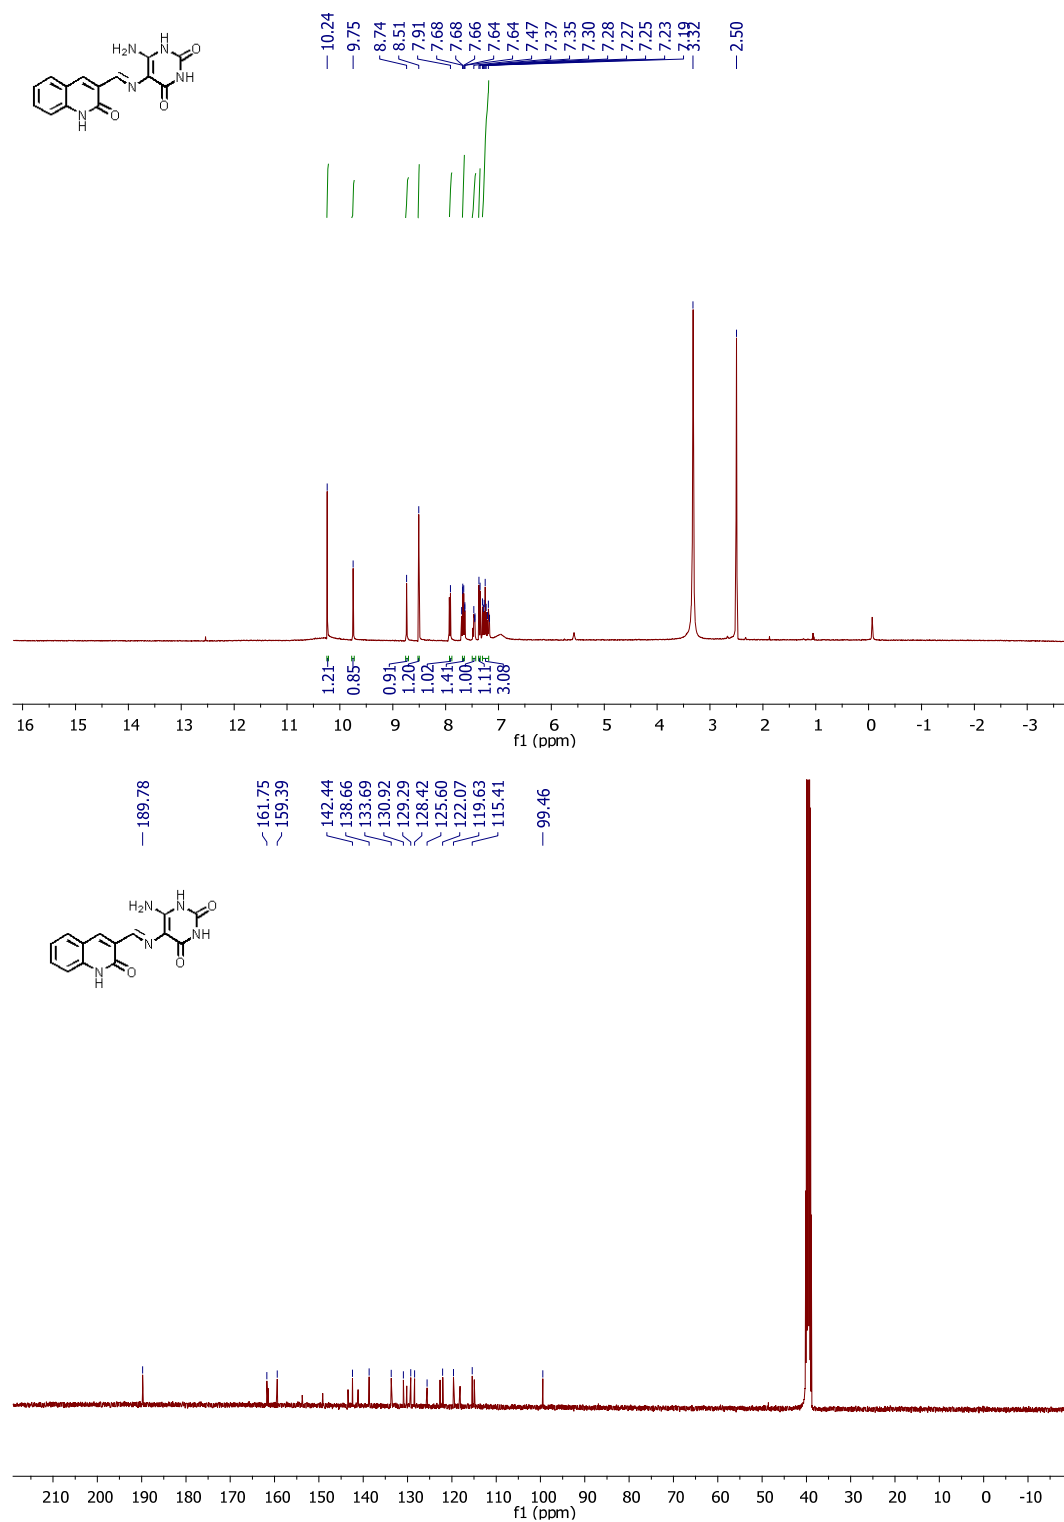

**Figure S2:**  $^1\text{H}$  NMR and  $^{13}\text{C}$  NMR spectra of (*E*)-6-amino-1-benzyl-5-(((2-oxo-1,2-dihydroquinolin-3-yl)methylene)amino)pyrimidine-2,4(1H,3H)-dione (10b)

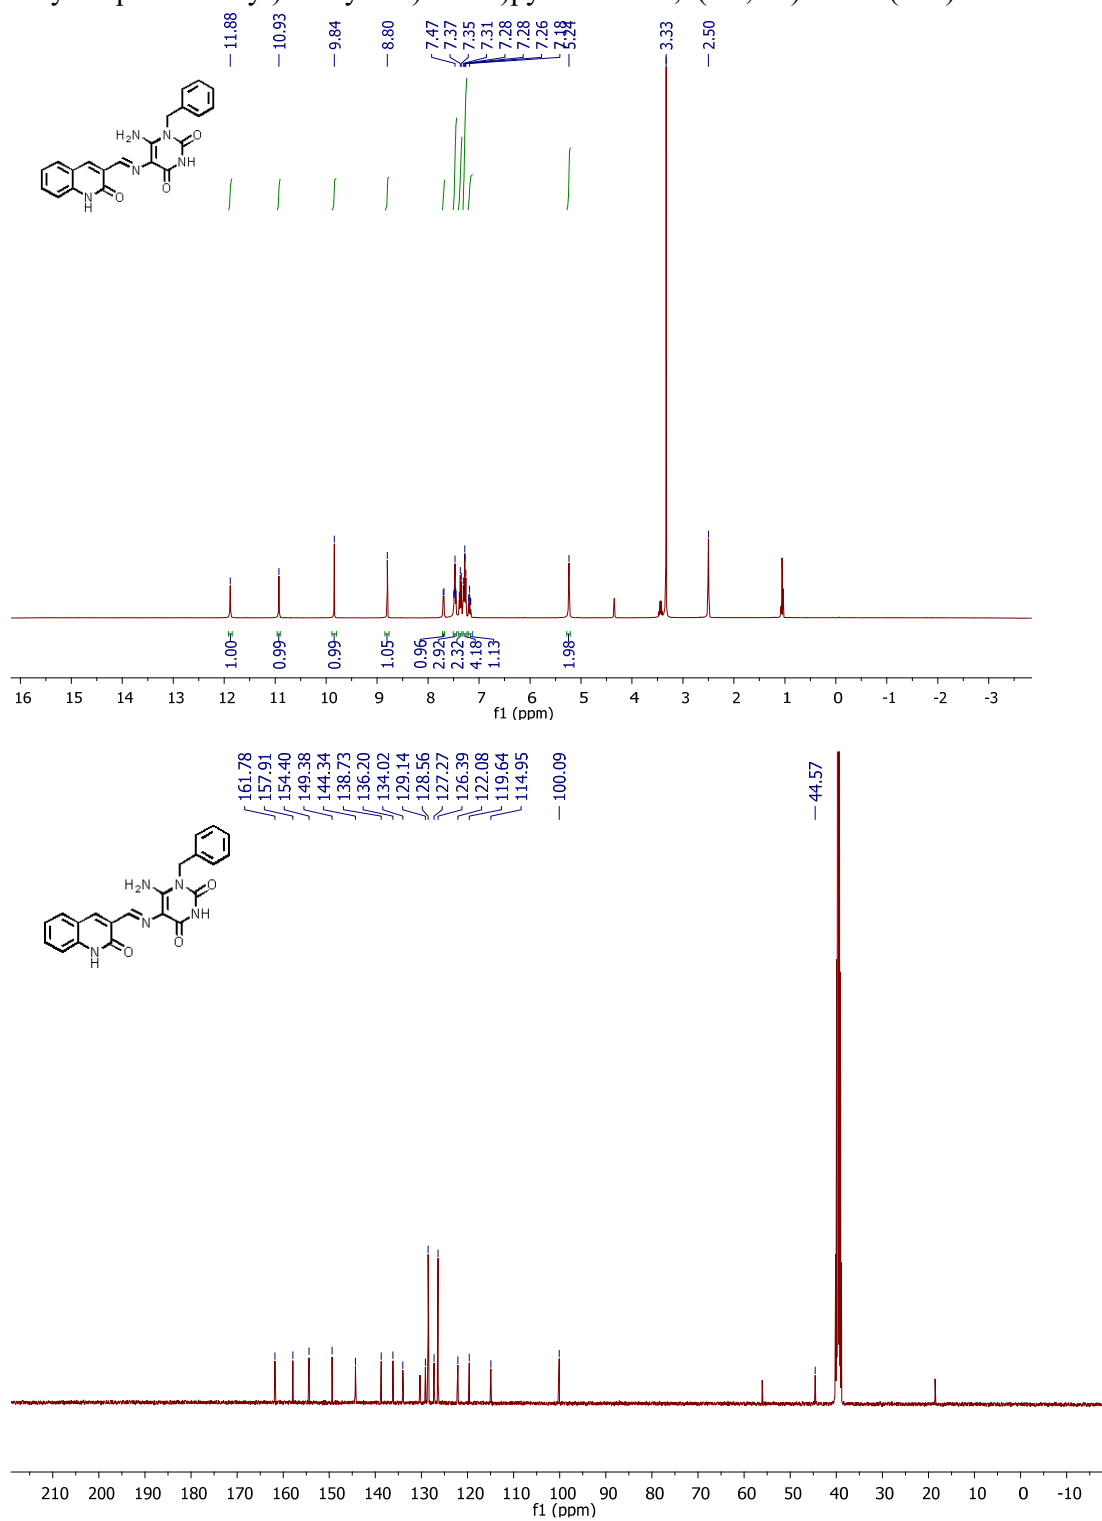

**Figure S3:**  $^1\text{H}$  NMR and  $^{13}\text{C}$  NMR spectra of (*E*)-6-amino-1-ethyl-5-(((2-oxo-1,2-dihydroquinolin-3-yl)methylene)amino)pyrimidine-2,4(1H,3H)-dione (10c).

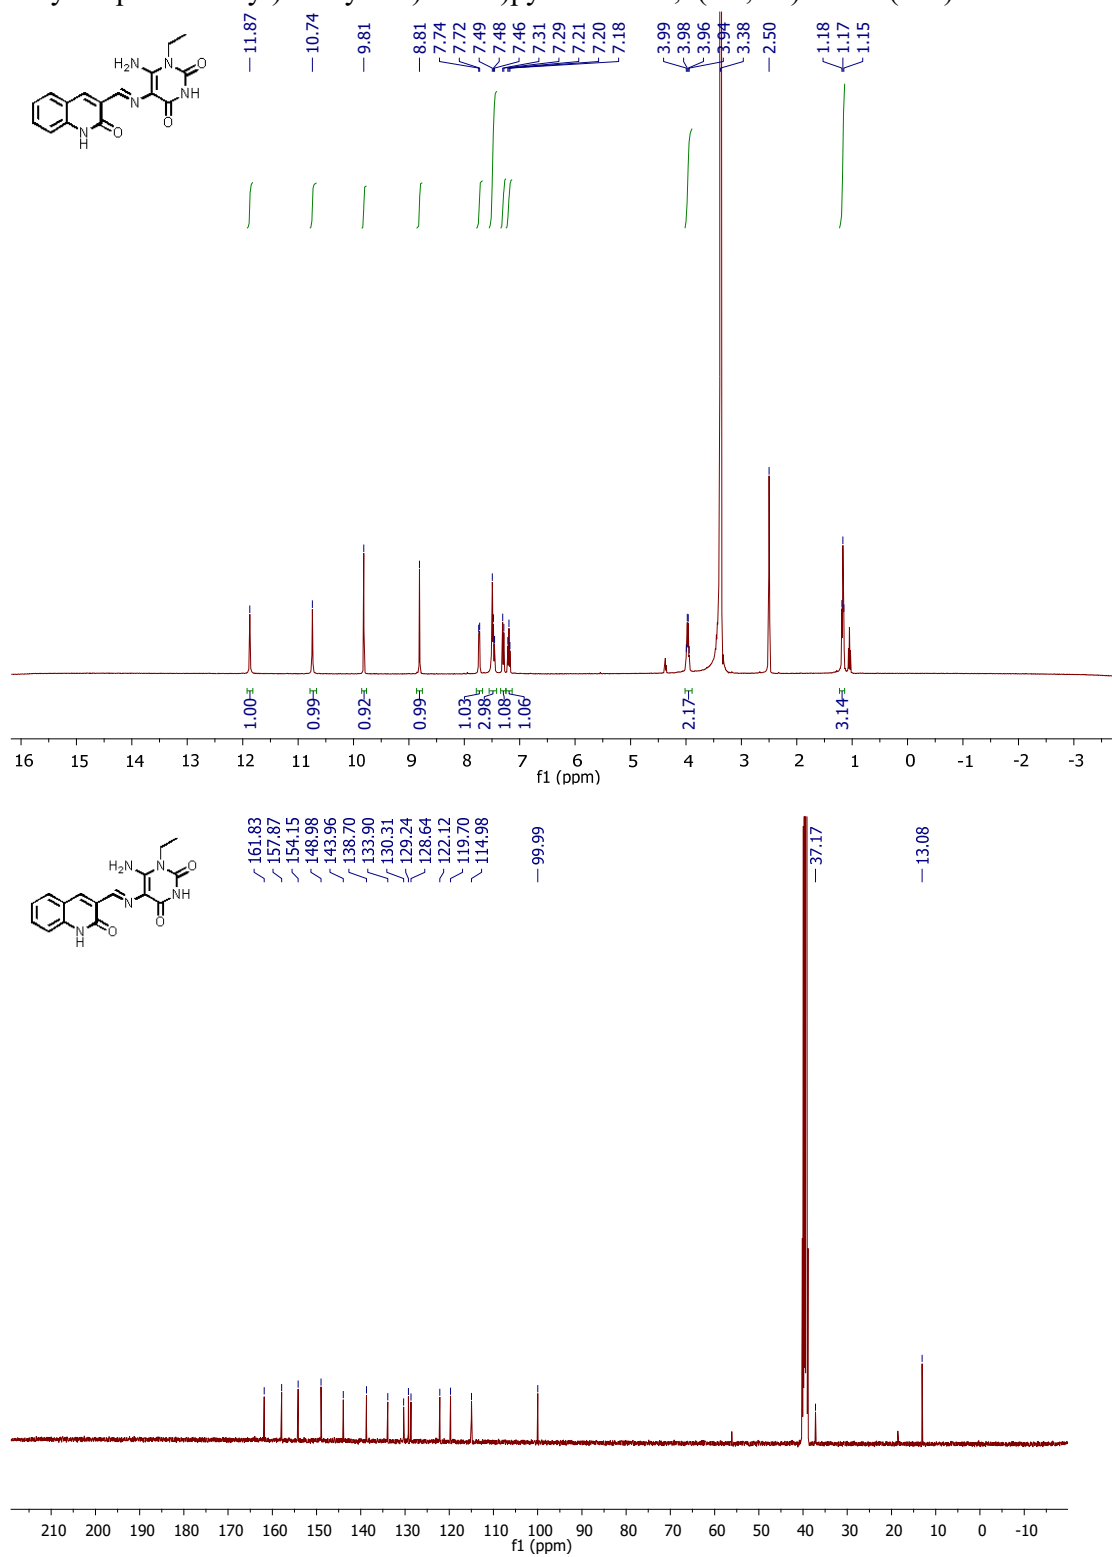

**Figure S4:**  $^1\text{H}$  NMR and  $^{13}\text{C}$  NMR spectra of (*E*)-6-amino-1-methyl-5-(((2-oxo-1,2-dihydroquinolin-3-yl)methylene)amino)pyrimidine-2,4(1H,3H)-dione (10d).

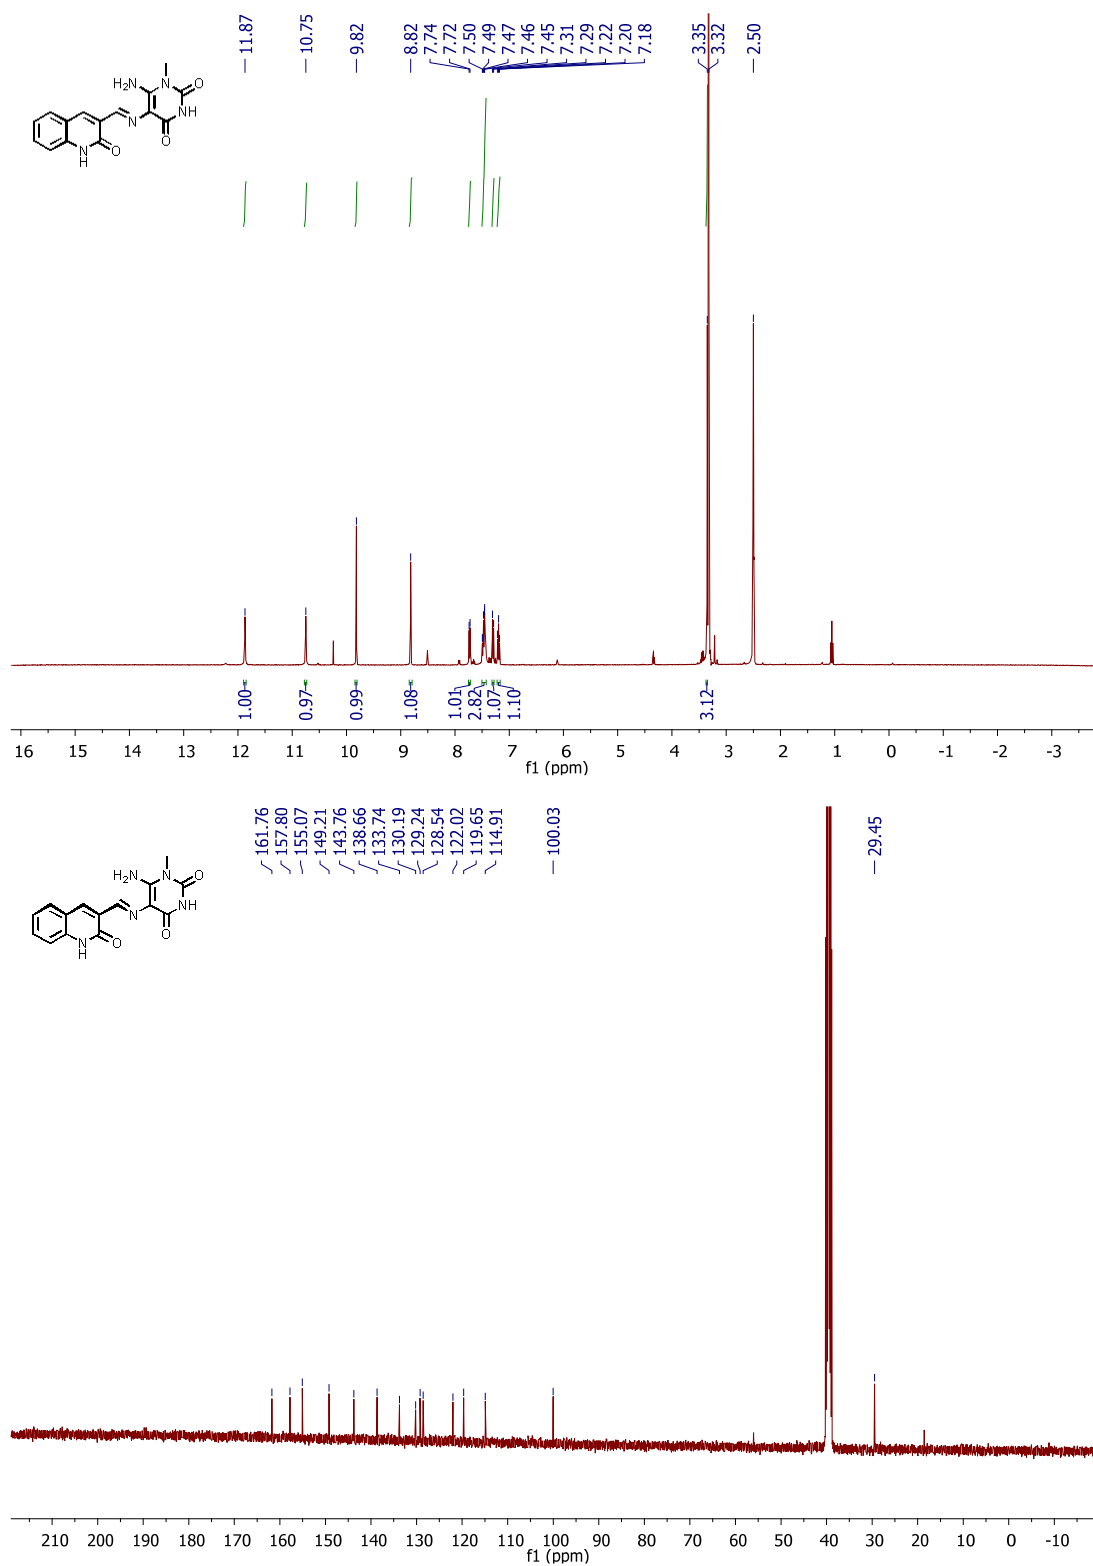

**Figure S5:**  $^1\text{H}$  NMR and  $^{13}\text{C}$  NMR spectra of (*E*)-3-(((6-amino-1-methyl-4-oxo-2-thioxo-1,2,3,4-tetrahydropyrimidin-5-yl)imino)methyl) quinolin-2(1H)-one (10e)

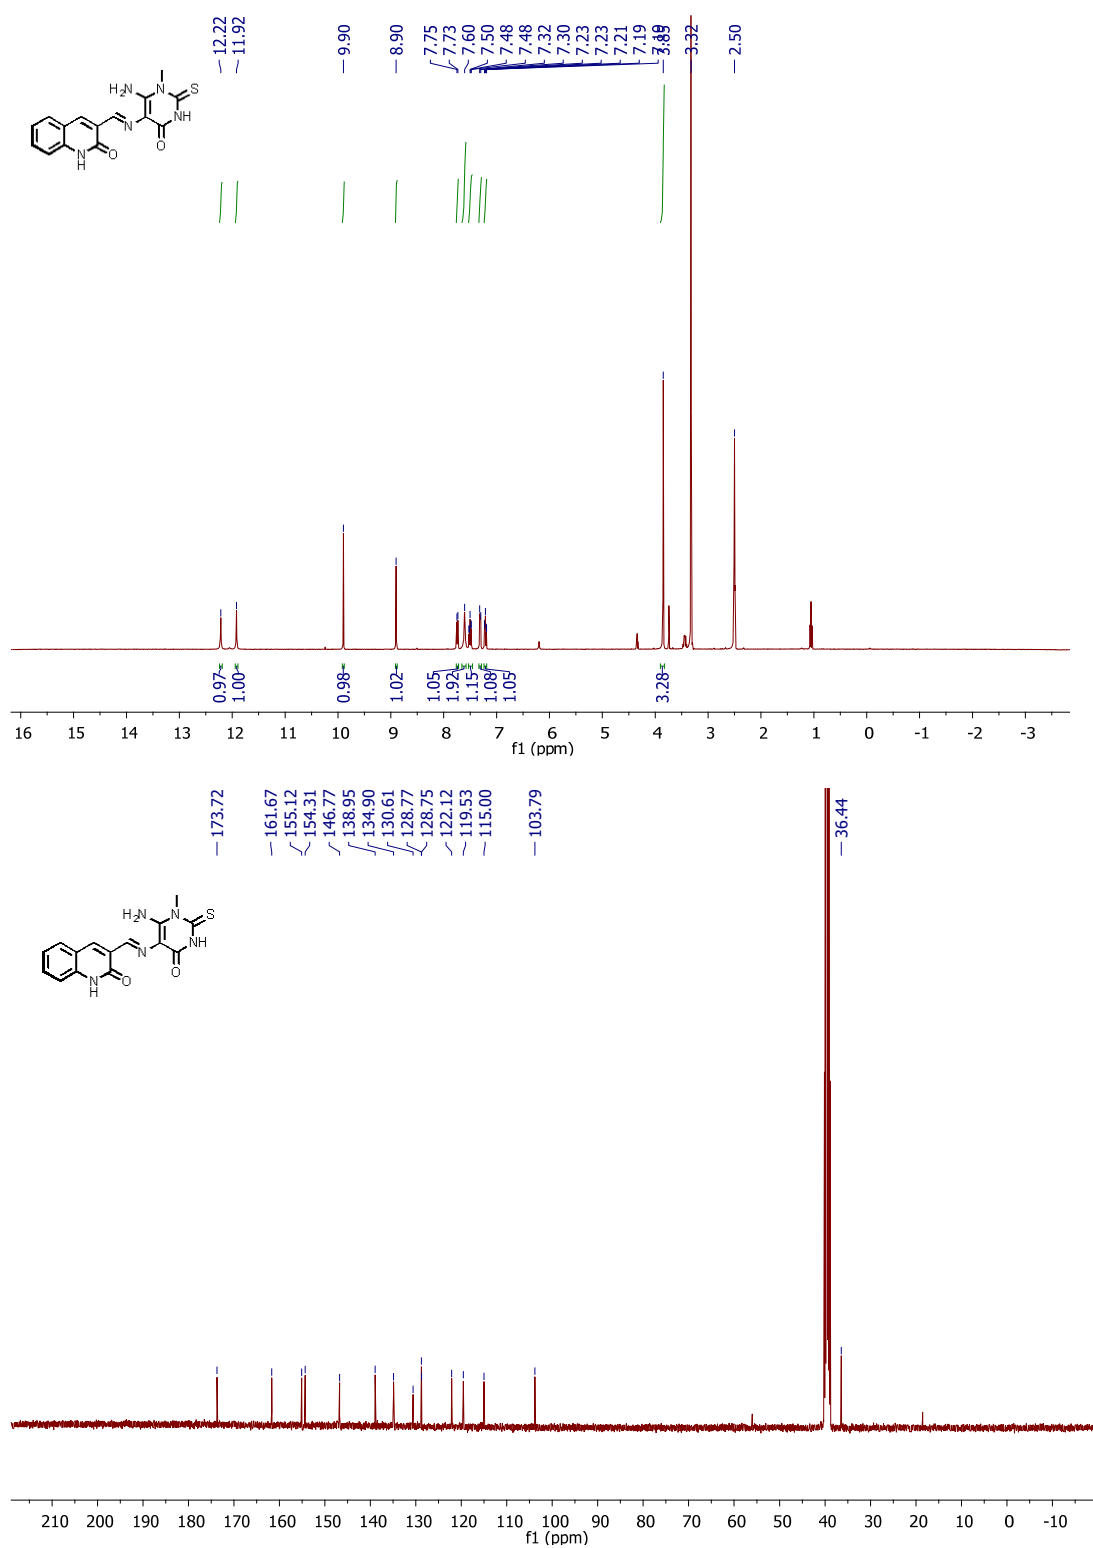

**Figure S6:**  $^1\text{H}$  NMR and  $^{13}\text{C}$  NMR spectra of (*E*)-6-amino-1-ethyl-5-(((8-methyl-2-oxo-1,2-dihydroquinolin-3-yl)methylene)amino) pyrimidine-2,4(1H,3H)-dione (10f)

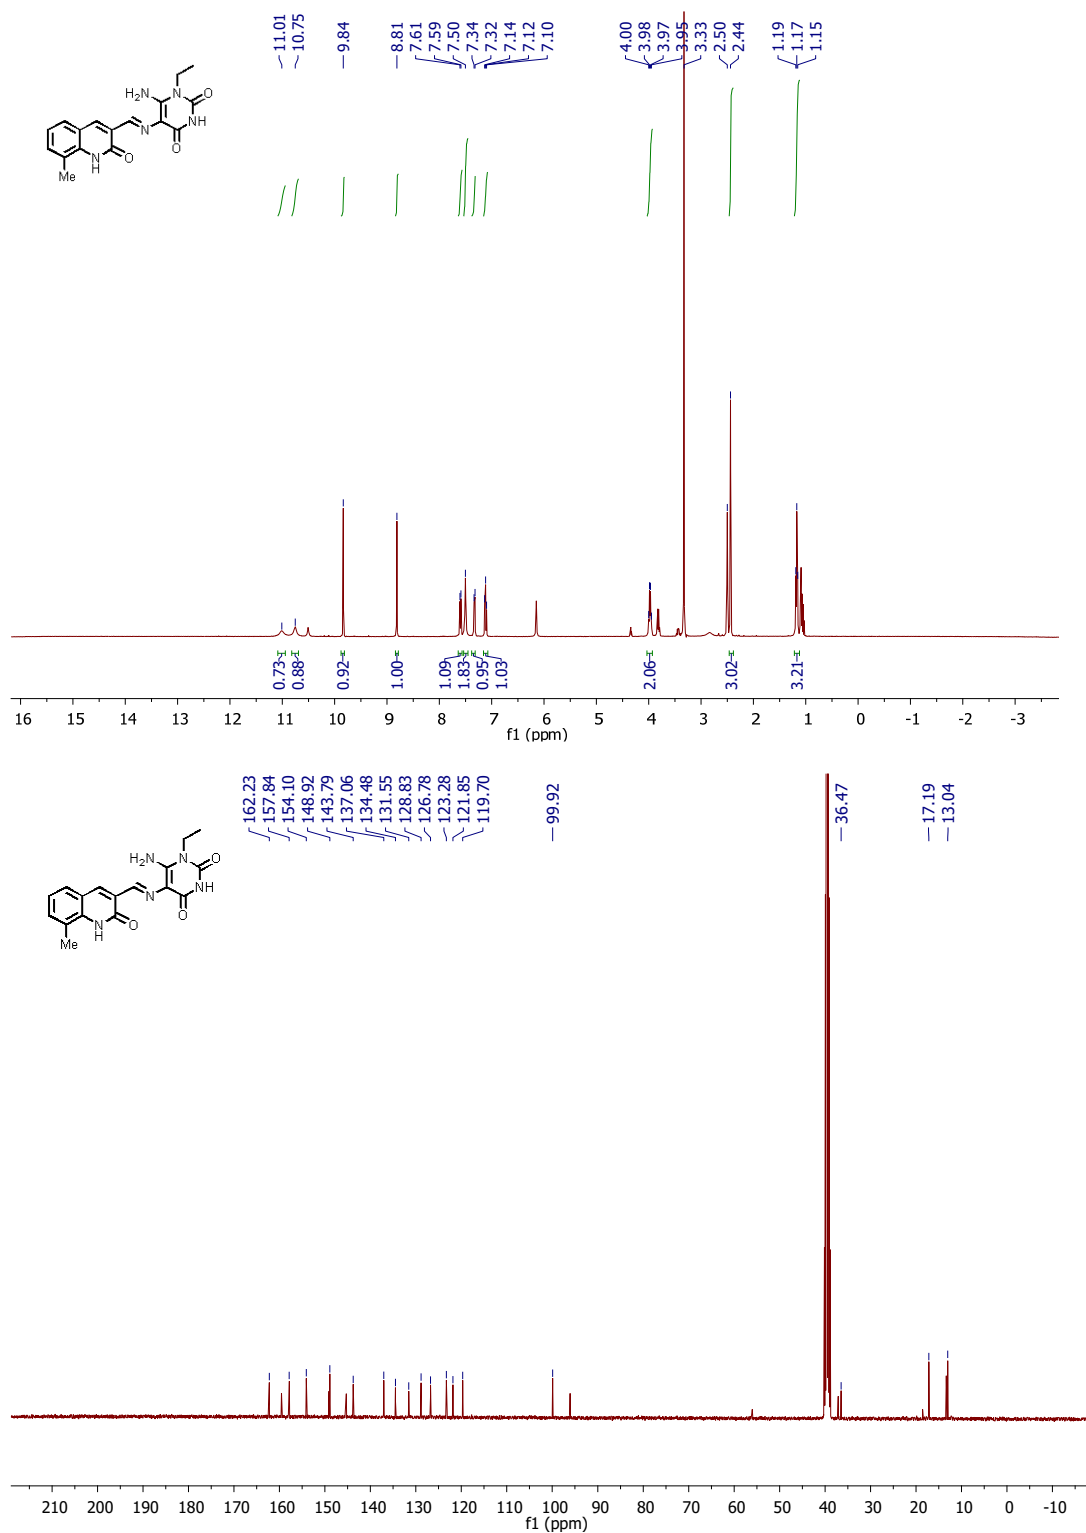



**Figure S7:**  $^1\text{H}$  NMR and  $^{13}\text{C}$  NMR spectra of (*E*)-3-(((6-amino-1-methyl-4-oxo-2-thioxo-1,2,3,4-tetrahydropyrimidin-5-yl)imino)methyl)-8-methylquinolin-2(1H)-one (10g)

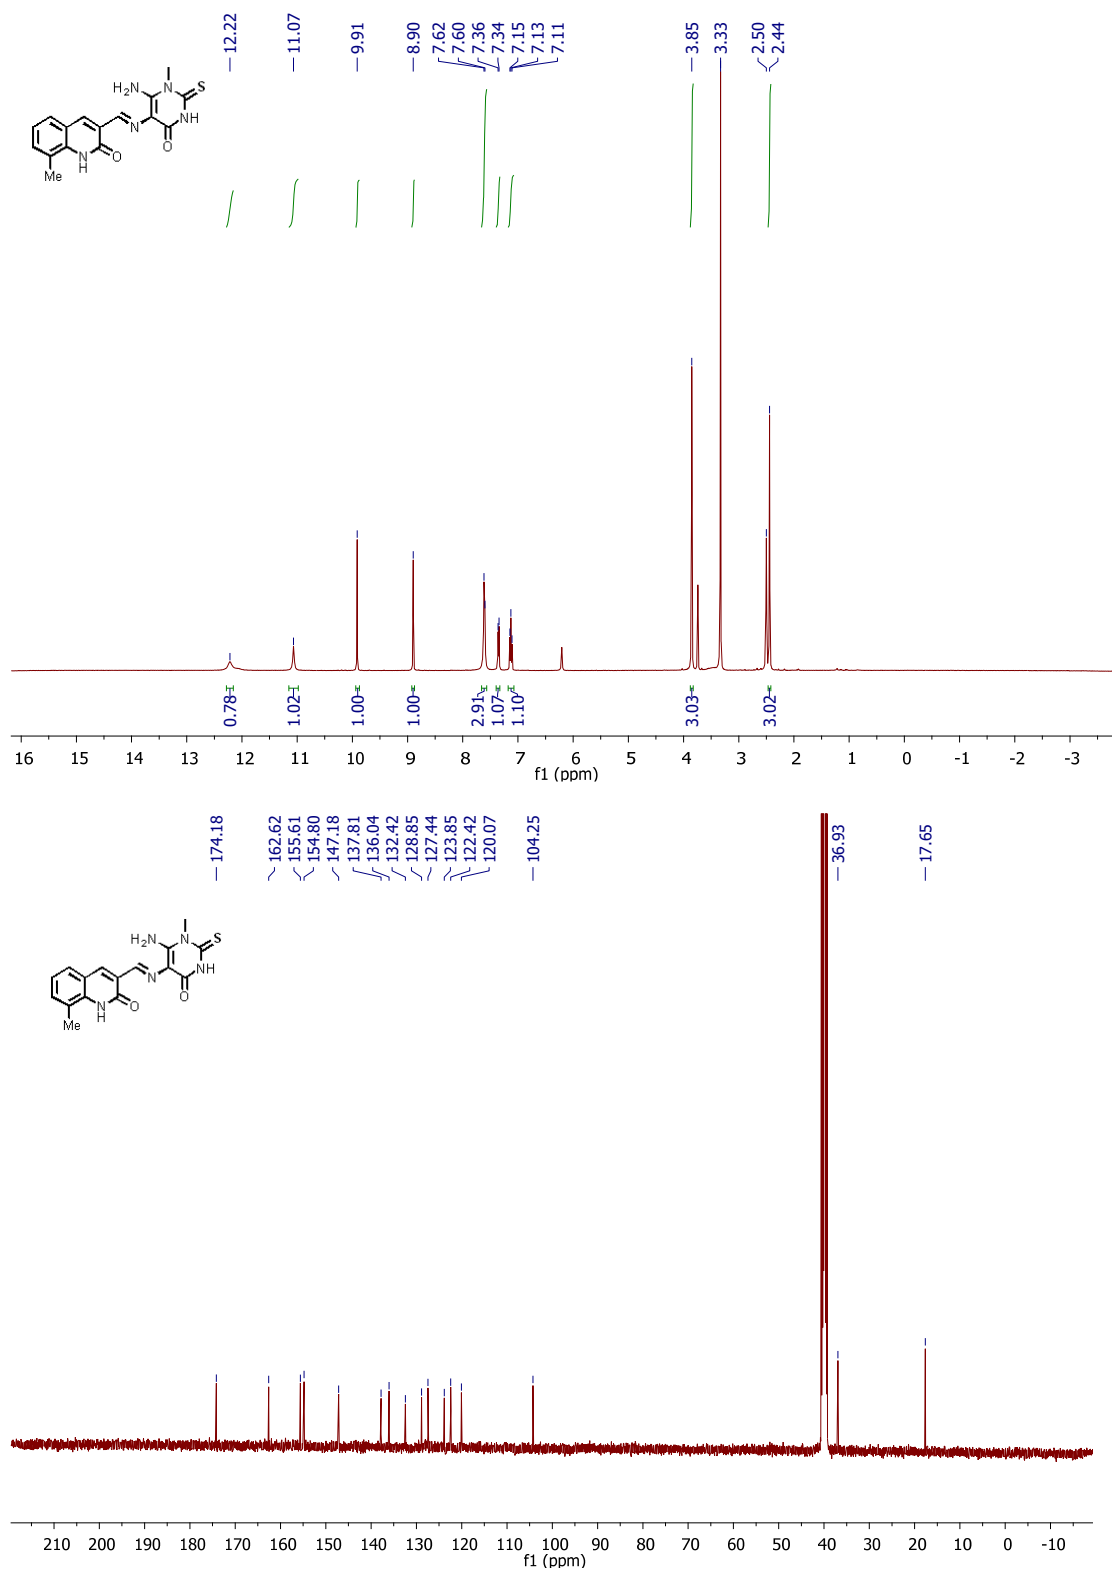

**Figure S8:**  $^1\text{H}$  NMR and  $^{13}\text{C}$  NMR spectra of (*E*)-6-amino-5-(((6-methoxy-2-oxo-1,2-dihydroquinolin-3-yl)methylene)amino)pyrimidine-2,4(1*H*,3*H*)-dione (10h)

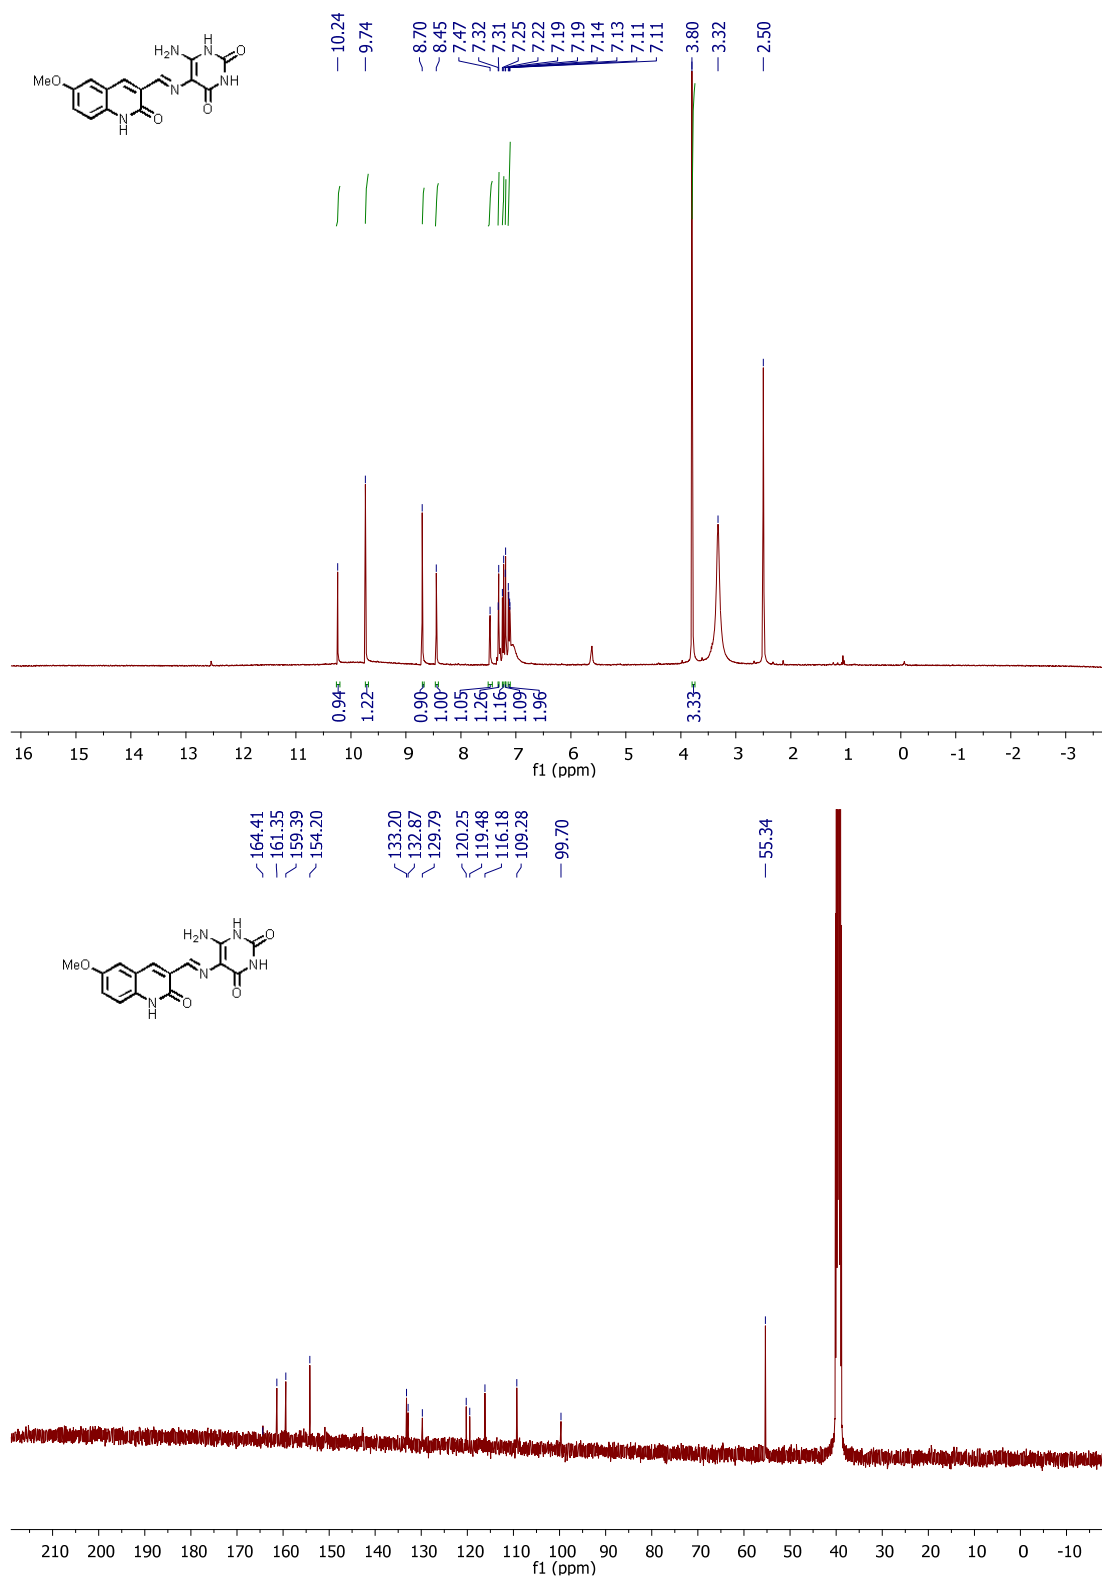

**Figure S9:**  $^1\text{H}$  NMR and  $^{13}\text{C}$  NMR spectra of (*E*)-6-amino-1-benzyl-5-(((6-methoxy-2-oxo-1,2-dihydroquinolin-3-yl)methylene)amino) pyrimidine-2,4(1H,3H)-dione (10i)

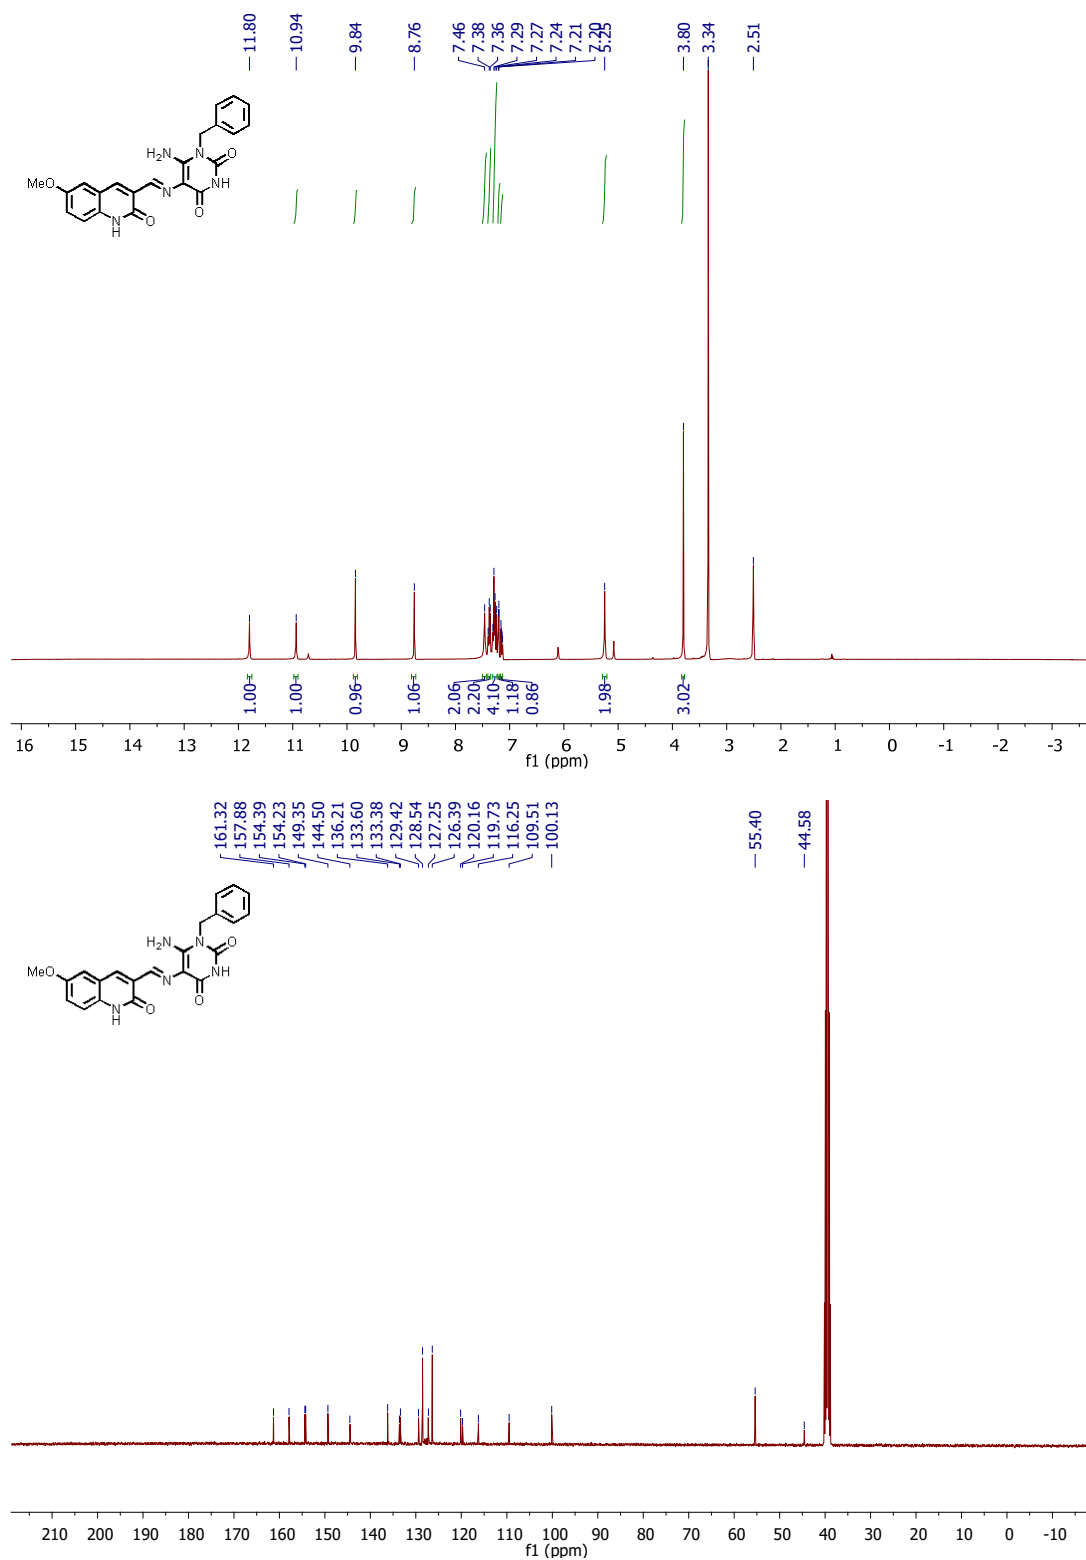

**Figure S10:**  $^1\text{H}$  NMR and  $^{13}\text{C}$  NMR spectra of (*E*)-6-amino-1-ethyl-5-(((6-methoxy-2-oxo-1,2-dihydroquinolin-3-yl)methylene)amino) pyrimidine-2,4(1H,3H)-dione (10j)

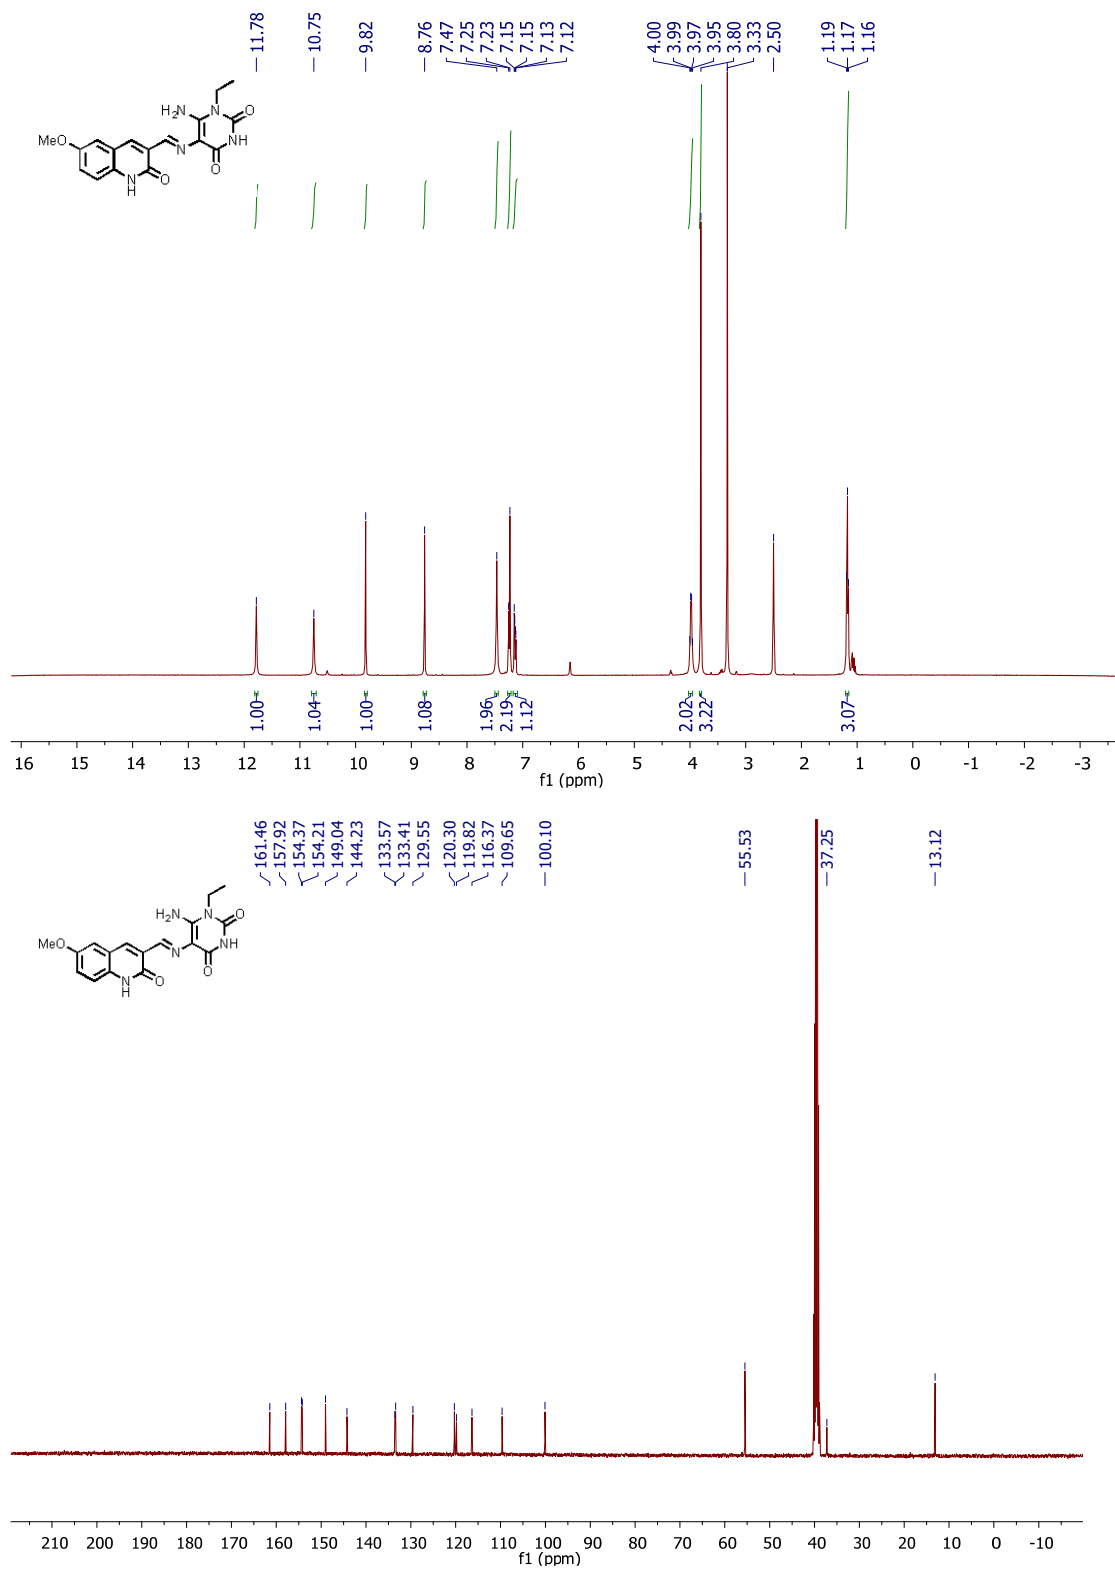

**Figure S11:**  $^1\text{H}$  NMR and  $^{13}\text{C}$  NMR spectra of (*E*)-6-amino-5-(((6-methoxy-2-oxo-1,2-dihydroquinolin-3-yl)methylene)amino)-1-methyl pyrimidine-2,4(1H,3H)-dione (10k)

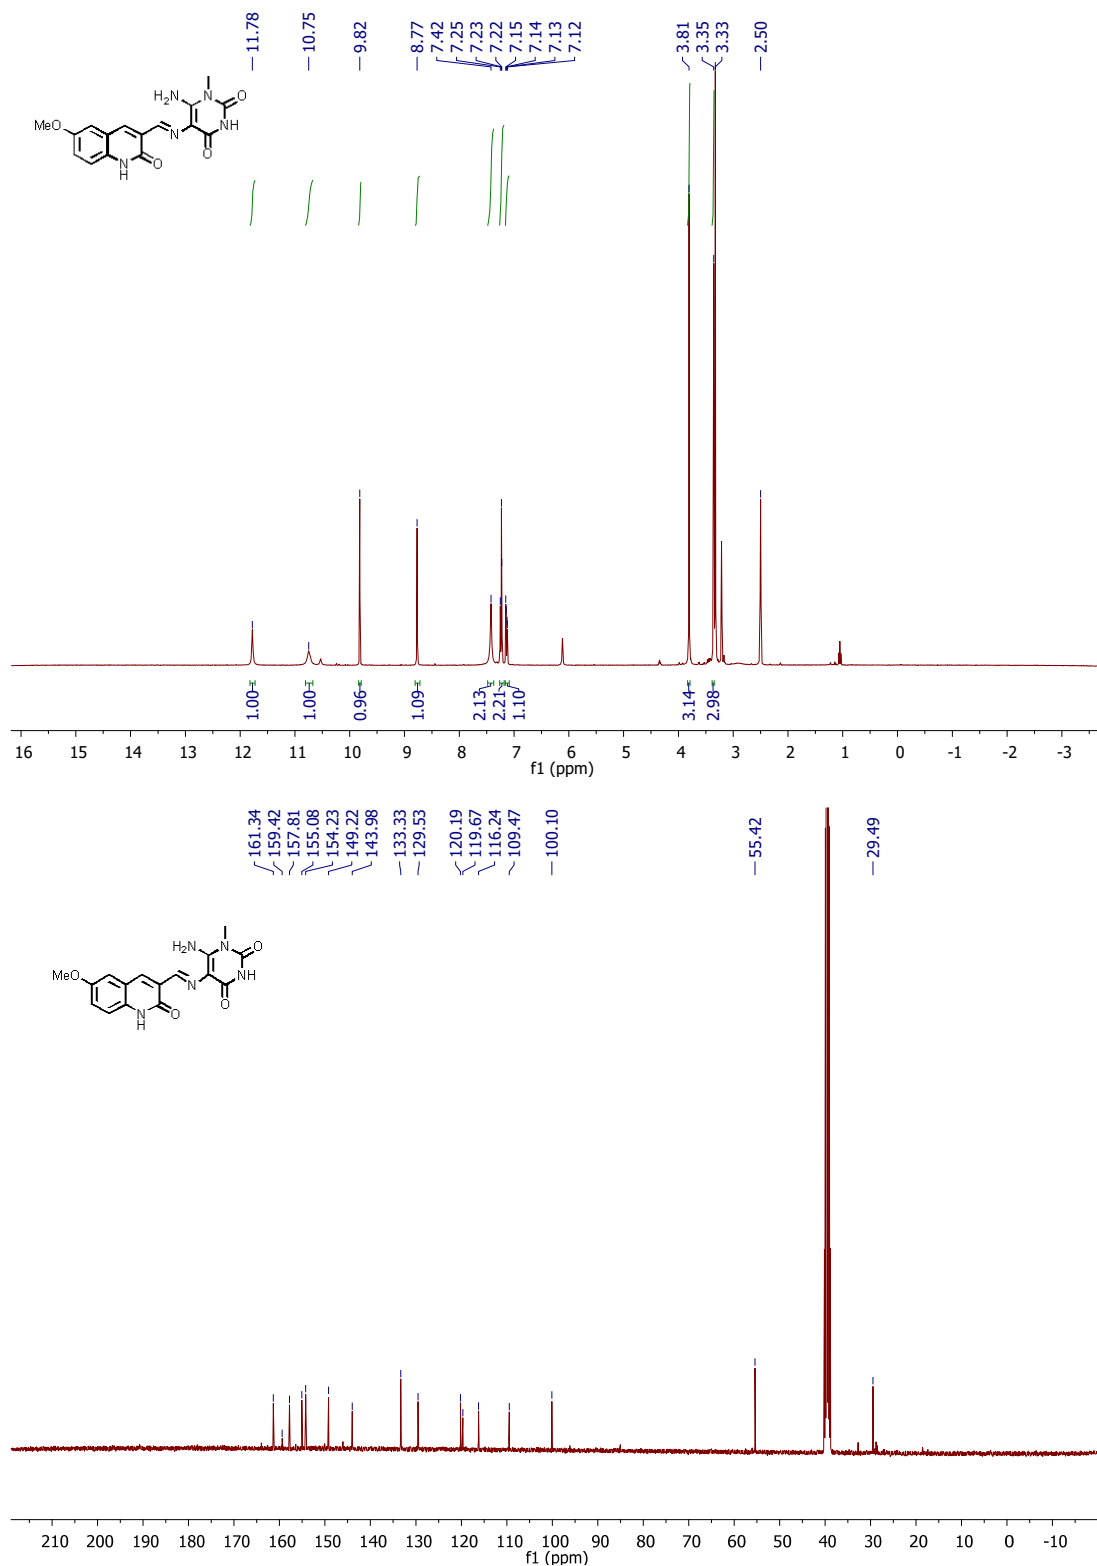

**Figure S12:**  $^1\text{H}$  NMR and  $^{13}\text{C}$  NMR spectra of (*E*)-3-(((6-amino-1-methyl-4-oxo-2-thioxo-1,2,3,4-tetrahydropyrimidin-5-yl)imino)methyl)-6-methoxyquinolin-2(1H)-one (10l)

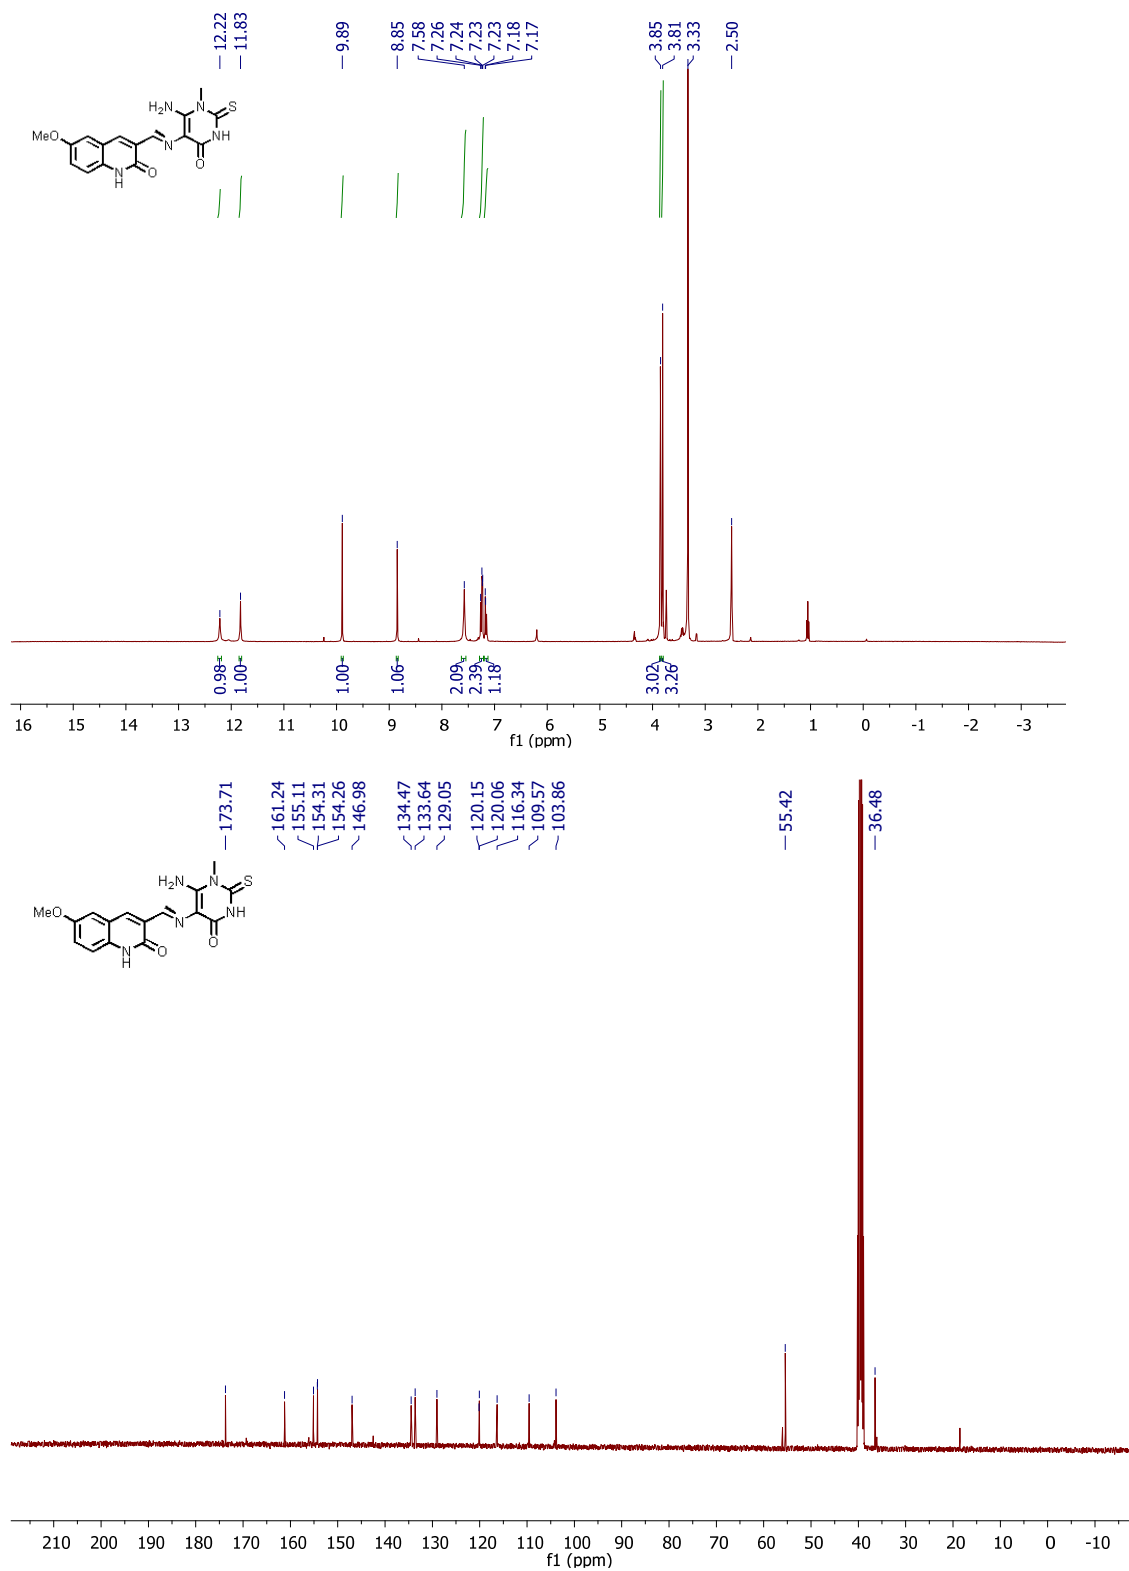

**Table S1. 2D & 3D interactions of new compounds with the binding site of the human carbonic anhydrases IX (PDB file 5FL4)**

| Compound | 2D Interaction | 3D Interaction |
|----------|----------------|----------------|
| 10a      |                |                |
| 10b      |                |                |
| 10c      |                |                |

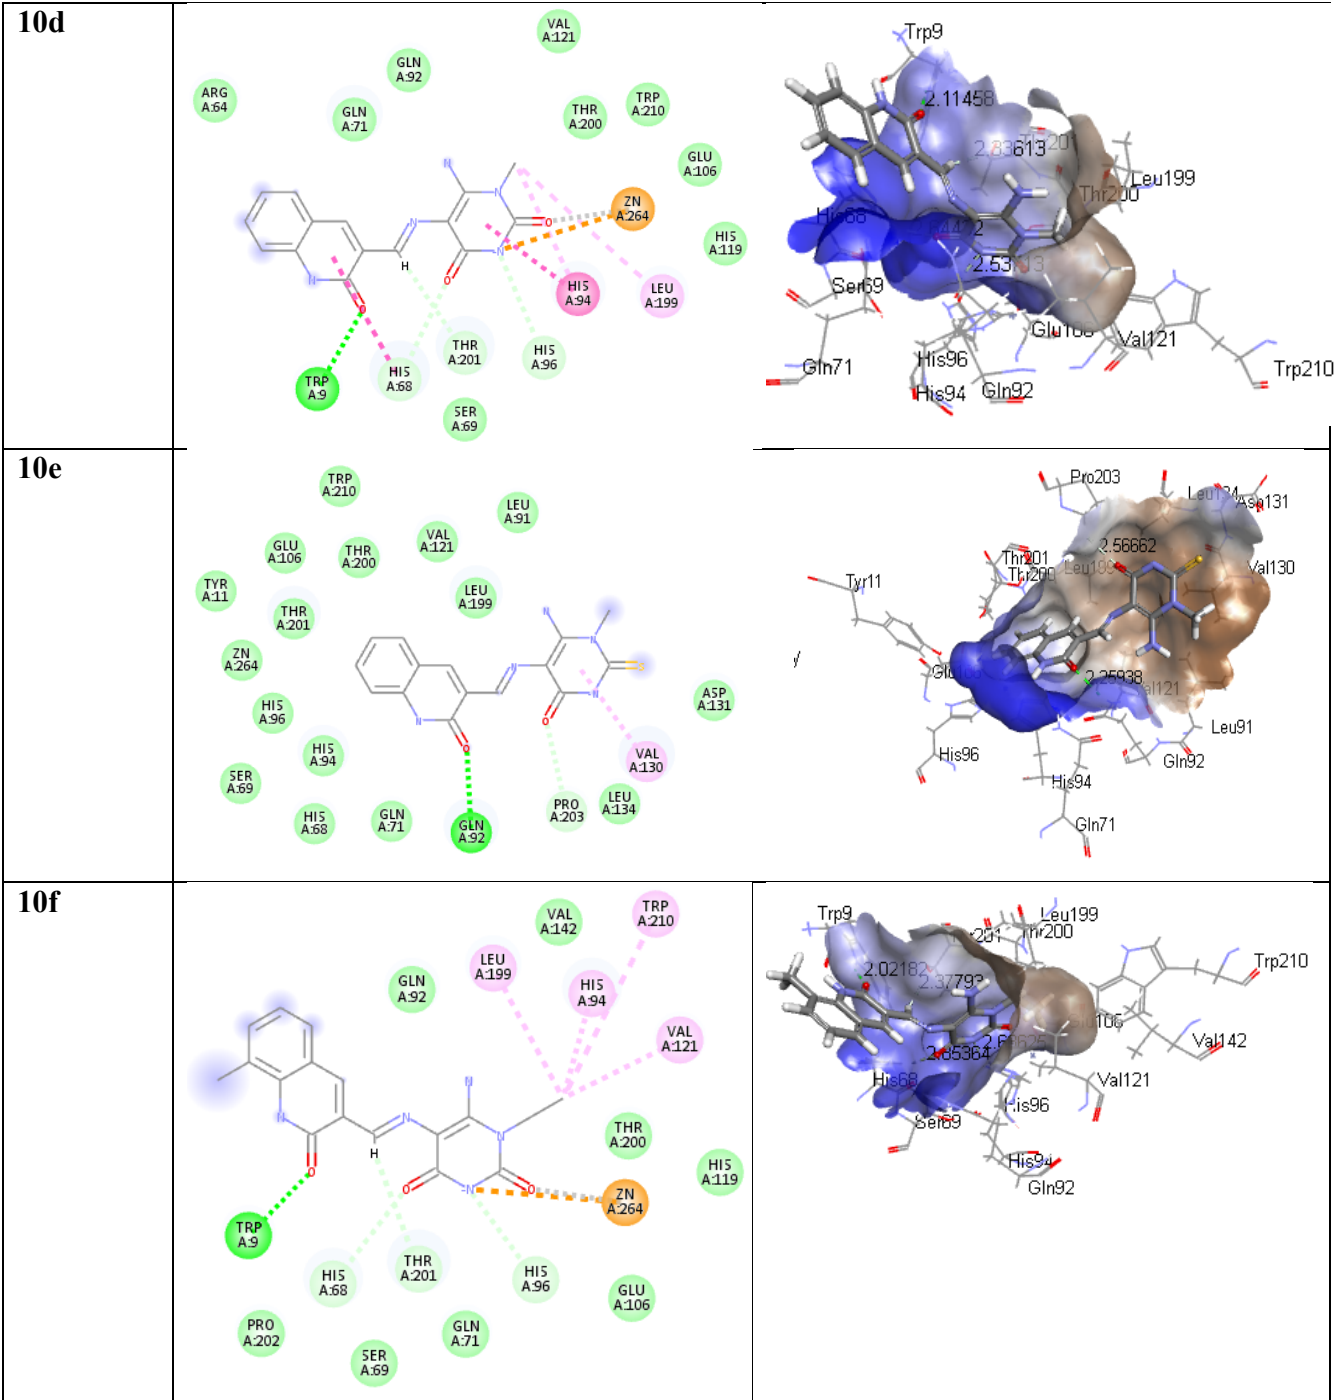



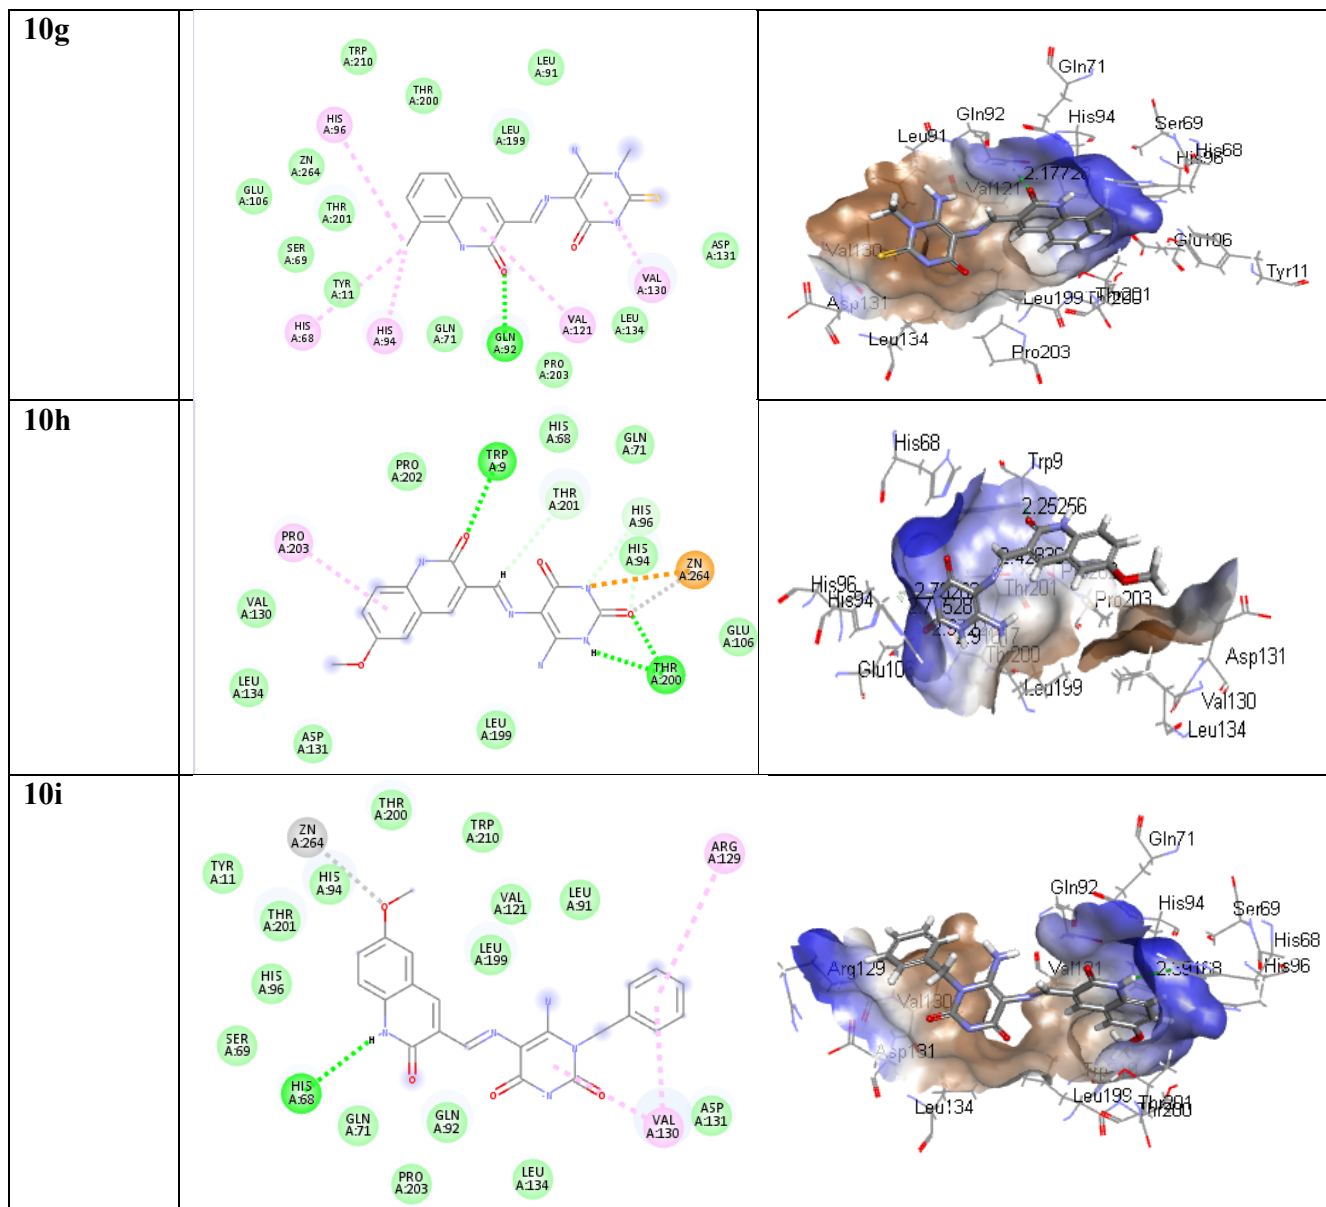



| Ligand |
|--------|
|--------|

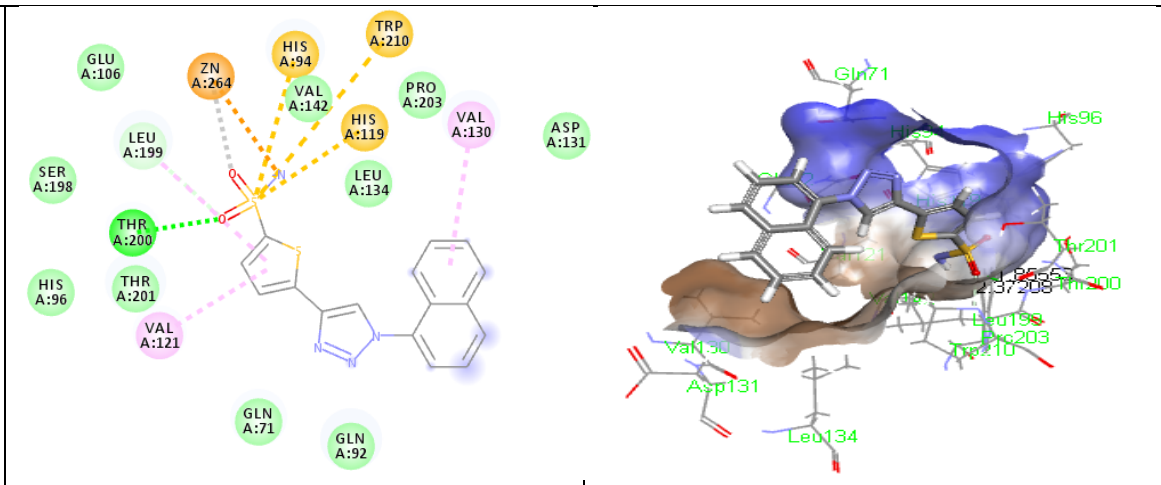

**Table S2: Mass spectra for compounds 10a-l**

| Compound | Mass spectrum                                                                                                                                                                                                                                                                                                                                                                                                                                                                                                                                                                                                                                                                                                                                                                                                                                                                                                                                                                                                                                                                                                                                                                                                                                                                                                                    |       |                              |       |    |       |    |       |    |       |    |       |    |       |    |       |    |       |    |       |    |        |    |        |    |        |    |        |    |        |    |        |    |        |    |        |    |        |    |        |    |        |    |        |    |        |    |        |    |        |    |        |    |
|----------|----------------------------------------------------------------------------------------------------------------------------------------------------------------------------------------------------------------------------------------------------------------------------------------------------------------------------------------------------------------------------------------------------------------------------------------------------------------------------------------------------------------------------------------------------------------------------------------------------------------------------------------------------------------------------------------------------------------------------------------------------------------------------------------------------------------------------------------------------------------------------------------------------------------------------------------------------------------------------------------------------------------------------------------------------------------------------------------------------------------------------------------------------------------------------------------------------------------------------------------------------------------------------------------------------------------------------------|-------|------------------------------|-------|----|-------|----|-------|----|-------|----|-------|----|-------|----|-------|----|-------|----|-------|----|--------|----|--------|----|--------|----|--------|----|--------|----|--------|----|--------|----|--------|----|--------|----|--------|----|--------|----|--------|----|--------|----|--------|----|--------|----|--------|----|
| 10a      | <p>Mass spectrum of compound 10a. The x-axis represents the mass-to-charge ratio (<math>m/z</math>) from 40 to 300, and the y-axis represents relative intensity from 0 to 100. The base peak is at <math>m/z</math> 44.37. Other labeled peaks include:</p> <table border="1"> <thead> <tr> <th><math>m/z</math></th> <th>Relative Intensity (approx.)</th> </tr> </thead> <tbody> <tr><td>45.31</td><td>45</td></tr> <tr><td>53.32</td><td>45</td></tr> <tr><td>54.34</td><td>25</td></tr> <tr><td>62.24</td><td>25</td></tr> <tr><td>69.16</td><td>15</td></tr> <tr><td>71.31</td><td>25</td></tr> <tr><td>81.30</td><td>15</td></tr> <tr><td>82.28</td><td>10</td></tr> <tr><td>96.48</td><td>15</td></tr> <tr><td>105.93</td><td>25</td></tr> <tr><td>111.20</td><td>35</td></tr> <tr><td>120.35</td><td>25</td></tr> <tr><td>143.22</td><td>35</td></tr> <tr><td>145.40</td><td>55</td></tr> <tr><td>162.35</td><td>15</td></tr> <tr><td>165.28</td><td>10</td></tr> <tr><td>228.10</td><td>25</td></tr> <tr><td>251.41</td><td>15</td></tr> <tr><td>262.12</td><td>15</td></tr> <tr><td>268.88</td><td>15</td></tr> <tr><td>278.77</td><td>15</td></tr> <tr><td>282.96</td><td>15</td></tr> <tr><td>292.87</td><td>15</td></tr> <tr><td>297.38</td><td>10</td></tr> <tr><td>295.51</td><td>55</td></tr> </tbody> </table> | $m/z$ | Relative Intensity (approx.) | 45.31 | 45 | 53.32 | 45 | 54.34 | 25 | 62.24 | 25 | 69.16 | 15 | 71.31 | 25 | 81.30 | 15 | 82.28 | 10 | 96.48 | 15 | 105.93 | 25 | 111.20 | 35 | 120.35 | 25 | 143.22 | 35 | 145.40 | 55 | 162.35 | 15 | 165.28 | 10 | 228.10 | 25 | 251.41 | 15 | 262.12 | 15 | 268.88 | 15 | 278.77 | 15 | 282.96 | 15 | 292.87 | 15 | 297.38 | 10 | 295.51 | 55 |
| $m/z$    | Relative Intensity (approx.)                                                                                                                                                                                                                                                                                                                                                                                                                                                                                                                                                                                                                                                                                                                                                                                                                                                                                                                                                                                                                                                                                                                                                                                                                                                                                                     |       |                              |       |    |       |    |       |    |       |    |       |    |       |    |       |    |       |    |       |    |        |    |        |    |        |    |        |    |        |    |        |    |        |    |        |    |        |    |        |    |        |    |        |    |        |    |        |    |        |    |        |    |
| 45.31    | 45                                                                                                                                                                                                                                                                                                                                                                                                                                                                                                                                                                                                                                                                                                                                                                                                                                                                                                                                                                                                                                                                                                                                                                                                                                                                                                                               |       |                              |       |    |       |    |       |    |       |    |       |    |       |    |       |    |       |    |       |    |        |    |        |    |        |    |        |    |        |    |        |    |        |    |        |    |        |    |        |    |        |    |        |    |        |    |        |    |        |    |        |    |
| 53.32    | 45                                                                                                                                                                                                                                                                                                                                                                                                                                                                                                                                                                                                                                                                                                                                                                                                                                                                                                                                                                                                                                                                                                                                                                                                                                                                                                                               |       |                              |       |    |       |    |       |    |       |    |       |    |       |    |       |    |       |    |       |    |        |    |        |    |        |    |        |    |        |    |        |    |        |    |        |    |        |    |        |    |        |    |        |    |        |    |        |    |        |    |        |    |
| 54.34    | 25                                                                                                                                                                                                                                                                                                                                                                                                                                                                                                                                                                                                                                                                                                                                                                                                                                                                                                                                                                                                                                                                                                                                                                                                                                                                                                                               |       |                              |       |    |       |    |       |    |       |    |       |    |       |    |       |    |       |    |       |    |        |    |        |    |        |    |        |    |        |    |        |    |        |    |        |    |        |    |        |    |        |    |        |    |        |    |        |    |        |    |        |    |
| 62.24    | 25                                                                                                                                                                                                                                                                                                                                                                                                                                                                                                                                                                                                                                                                                                                                                                                                                                                                                                                                                                                                                                                                                                                                                                                                                                                                                                                               |       |                              |       |    |       |    |       |    |       |    |       |    |       |    |       |    |       |    |       |    |        |    |        |    |        |    |        |    |        |    |        |    |        |    |        |    |        |    |        |    |        |    |        |    |        |    |        |    |        |    |        |    |
| 69.16    | 15                                                                                                                                                                                                                                                                                                                                                                                                                                                                                                                                                                                                                                                                                                                                                                                                                                                                                                                                                                                                                                                                                                                                                                                                                                                                                                                               |       |                              |       |    |       |    |       |    |       |    |       |    |       |    |       |    |       |    |       |    |        |    |        |    |        |    |        |    |        |    |        |    |        |    |        |    |        |    |        |    |        |    |        |    |        |    |        |    |        |    |        |    |
| 71.31    | 25                                                                                                                                                                                                                                                                                                                                                                                                                                                                                                                                                                                                                                                                                                                                                                                                                                                                                                                                                                                                                                                                                                                                                                                                                                                                                                                               |       |                              |       |    |       |    |       |    |       |    |       |    |       |    |       |    |       |    |       |    |        |    |        |    |        |    |        |    |        |    |        |    |        |    |        |    |        |    |        |    |        |    |        |    |        |    |        |    |        |    |        |    |
| 81.30    | 15                                                                                                                                                                                                                                                                                                                                                                                                                                                                                                                                                                                                                                                                                                                                                                                                                                                                                                                                                                                                                                                                                                                                                                                                                                                                                                                               |       |                              |       |    |       |    |       |    |       |    |       |    |       |    |       |    |       |    |       |    |        |    |        |    |        |    |        |    |        |    |        |    |        |    |        |    |        |    |        |    |        |    |        |    |        |    |        |    |        |    |        |    |
| 82.28    | 10                                                                                                                                                                                                                                                                                                                                                                                                                                                                                                                                                                                                                                                                                                                                                                                                                                                                                                                                                                                                                                                                                                                                                                                                                                                                                                                               |       |                              |       |    |       |    |       |    |       |    |       |    |       |    |       |    |       |    |       |    |        |    |        |    |        |    |        |    |        |    |        |    |        |    |        |    |        |    |        |    |        |    |        |    |        |    |        |    |        |    |        |    |
| 96.48    | 15                                                                                                                                                                                                                                                                                                                                                                                                                                                                                                                                                                                                                                                                                                                                                                                                                                                                                                                                                                                                                                                                                                                                                                                                                                                                                                                               |       |                              |       |    |       |    |       |    |       |    |       |    |       |    |       |    |       |    |       |    |        |    |        |    |        |    |        |    |        |    |        |    |        |    |        |    |        |    |        |    |        |    |        |    |        |    |        |    |        |    |        |    |
| 105.93   | 25                                                                                                                                                                                                                                                                                                                                                                                                                                                                                                                                                                                                                                                                                                                                                                                                                                                                                                                                                                                                                                                                                                                                                                                                                                                                                                                               |       |                              |       |    |       |    |       |    |       |    |       |    |       |    |       |    |       |    |       |    |        |    |        |    |        |    |        |    |        |    |        |    |        |    |        |    |        |    |        |    |        |    |        |    |        |    |        |    |        |    |        |    |
| 111.20   | 35                                                                                                                                                                                                                                                                                                                                                                                                                                                                                                                                                                                                                                                                                                                                                                                                                                                                                                                                                                                                                                                                                                                                                                                                                                                                                                                               |       |                              |       |    |       |    |       |    |       |    |       |    |       |    |       |    |       |    |       |    |        |    |        |    |        |    |        |    |        |    |        |    |        |    |        |    |        |    |        |    |        |    |        |    |        |    |        |    |        |    |        |    |
| 120.35   | 25                                                                                                                                                                                                                                                                                                                                                                                                                                                                                                                                                                                                                                                                                                                                                                                                                                                                                                                                                                                                                                                                                                                                                                                                                                                                                                                               |       |                              |       |    |       |    |       |    |       |    |       |    |       |    |       |    |       |    |       |    |        |    |        |    |        |    |        |    |        |    |        |    |        |    |        |    |        |    |        |    |        |    |        |    |        |    |        |    |        |    |        |    |
| 143.22   | 35                                                                                                                                                                                                                                                                                                                                                                                                                                                                                                                                                                                                                                                                                                                                                                                                                                                                                                                                                                                                                                                                                                                                                                                                                                                                                                                               |       |                              |       |    |       |    |       |    |       |    |       |    |       |    |       |    |       |    |       |    |        |    |        |    |        |    |        |    |        |    |        |    |        |    |        |    |        |    |        |    |        |    |        |    |        |    |        |    |        |    |        |    |
| 145.40   | 55                                                                                                                                                                                                                                                                                                                                                                                                                                                                                                                                                                                                                                                                                                                                                                                                                                                                                                                                                                                                                                                                                                                                                                                                                                                                                                                               |       |                              |       |    |       |    |       |    |       |    |       |    |       |    |       |    |       |    |       |    |        |    |        |    |        |    |        |    |        |    |        |    |        |    |        |    |        |    |        |    |        |    |        |    |        |    |        |    |        |    |        |    |
| 162.35   | 15                                                                                                                                                                                                                                                                                                                                                                                                                                                                                                                                                                                                                                                                                                                                                                                                                                                                                                                                                                                                                                                                                                                                                                                                                                                                                                                               |       |                              |       |    |       |    |       |    |       |    |       |    |       |    |       |    |       |    |       |    |        |    |        |    |        |    |        |    |        |    |        |    |        |    |        |    |        |    |        |    |        |    |        |    |        |    |        |    |        |    |        |    |
| 165.28   | 10                                                                                                                                                                                                                                                                                                                                                                                                                                                                                                                                                                                                                                                                                                                                                                                                                                                                                                                                                                                                                                                                                                                                                                                                                                                                                                                               |       |                              |       |    |       |    |       |    |       |    |       |    |       |    |       |    |       |    |       |    |        |    |        |    |        |    |        |    |        |    |        |    |        |    |        |    |        |    |        |    |        |    |        |    |        |    |        |    |        |    |        |    |
| 228.10   | 25                                                                                                                                                                                                                                                                                                                                                                                                                                                                                                                                                                                                                                                                                                                                                                                                                                                                                                                                                                                                                                                                                                                                                                                                                                                                                                                               |       |                              |       |    |       |    |       |    |       |    |       |    |       |    |       |    |       |    |       |    |        |    |        |    |        |    |        |    |        |    |        |    |        |    |        |    |        |    |        |    |        |    |        |    |        |    |        |    |        |    |        |    |
| 251.41   | 15                                                                                                                                                                                                                                                                                                                                                                                                                                                                                                                                                                                                                                                                                                                                                                                                                                                                                                                                                                                                                                                                                                                                                                                                                                                                                                                               |       |                              |       |    |       |    |       |    |       |    |       |    |       |    |       |    |       |    |       |    |        |    |        |    |        |    |        |    |        |    |        |    |        |    |        |    |        |    |        |    |        |    |        |    |        |    |        |    |        |    |        |    |
| 262.12   | 15                                                                                                                                                                                                                                                                                                                                                                                                                                                                                                                                                                                                                                                                                                                                                                                                                                                                                                                                                                                                                                                                                                                                                                                                                                                                                                                               |       |                              |       |    |       |    |       |    |       |    |       |    |       |    |       |    |       |    |       |    |        |    |        |    |        |    |        |    |        |    |        |    |        |    |        |    |        |    |        |    |        |    |        |    |        |    |        |    |        |    |        |    |
| 268.88   | 15                                                                                                                                                                                                                                                                                                                                                                                                                                                                                                                                                                                                                                                                                                                                                                                                                                                                                                                                                                                                                                                                                                                                                                                                                                                                                                                               |       |                              |       |    |       |    |       |    |       |    |       |    |       |    |       |    |       |    |       |    |        |    |        |    |        |    |        |    |        |    |        |    |        |    |        |    |        |    |        |    |        |    |        |    |        |    |        |    |        |    |        |    |
| 278.77   | 15                                                                                                                                                                                                                                                                                                                                                                                                                                                                                                                                                                                                                                                                                                                                                                                                                                                                                                                                                                                                                                                                                                                                                                                                                                                                                                                               |       |                              |       |    |       |    |       |    |       |    |       |    |       |    |       |    |       |    |       |    |        |    |        |    |        |    |        |    |        |    |        |    |        |    |        |    |        |    |        |    |        |    |        |    |        |    |        |    |        |    |        |    |
| 282.96   | 15                                                                                                                                                                                                                                                                                                                                                                                                                                                                                                                                                                                                                                                                                                                                                                                                                                                                                                                                                                                                                                                                                                                                                                                                                                                                                                                               |       |                              |       |    |       |    |       |    |       |    |       |    |       |    |       |    |       |    |       |    |        |    |        |    |        |    |        |    |        |    |        |    |        |    |        |    |        |    |        |    |        |    |        |    |        |    |        |    |        |    |        |    |
| 292.87   | 15                                                                                                                                                                                                                                                                                                                                                                                                                                                                                                                                                                                                                                                                                                                                                                                                                                                                                                                                                                                                                                                                                                                                                                                                                                                                                                                               |       |                              |       |    |       |    |       |    |       |    |       |    |       |    |       |    |       |    |       |    |        |    |        |    |        |    |        |    |        |    |        |    |        |    |        |    |        |    |        |    |        |    |        |    |        |    |        |    |        |    |        |    |
| 297.38   | 10                                                                                                                                                                                                                                                                                                                                                                                                                                                                                                                                                                                                                                                                                                                                                                                                                                                                                                                                                                                                                                                                                                                                                                                                                                                                                                                               |       |                              |       |    |       |    |       |    |       |    |       |    |       |    |       |    |       |    |       |    |        |    |        |    |        |    |        |    |        |    |        |    |        |    |        |    |        |    |        |    |        |    |        |    |        |    |        |    |        |    |        |    |
| 295.51   | 55                                                                                                                                                                                                                                                                                                                                                                                                                                                                                                                                                                                                                                                                                                                                                                                                                                                                                                                                                                                                                                                                                                                                                                                                                                                                                                                               |       |                              |       |    |       |    |       |    |       |    |       |    |       |    |       |    |       |    |       |    |        |    |        |    |        |    |        |    |        |    |        |    |        |    |        |    |        |    |        |    |        |    |        |    |        |    |        |    |        |    |        |    |

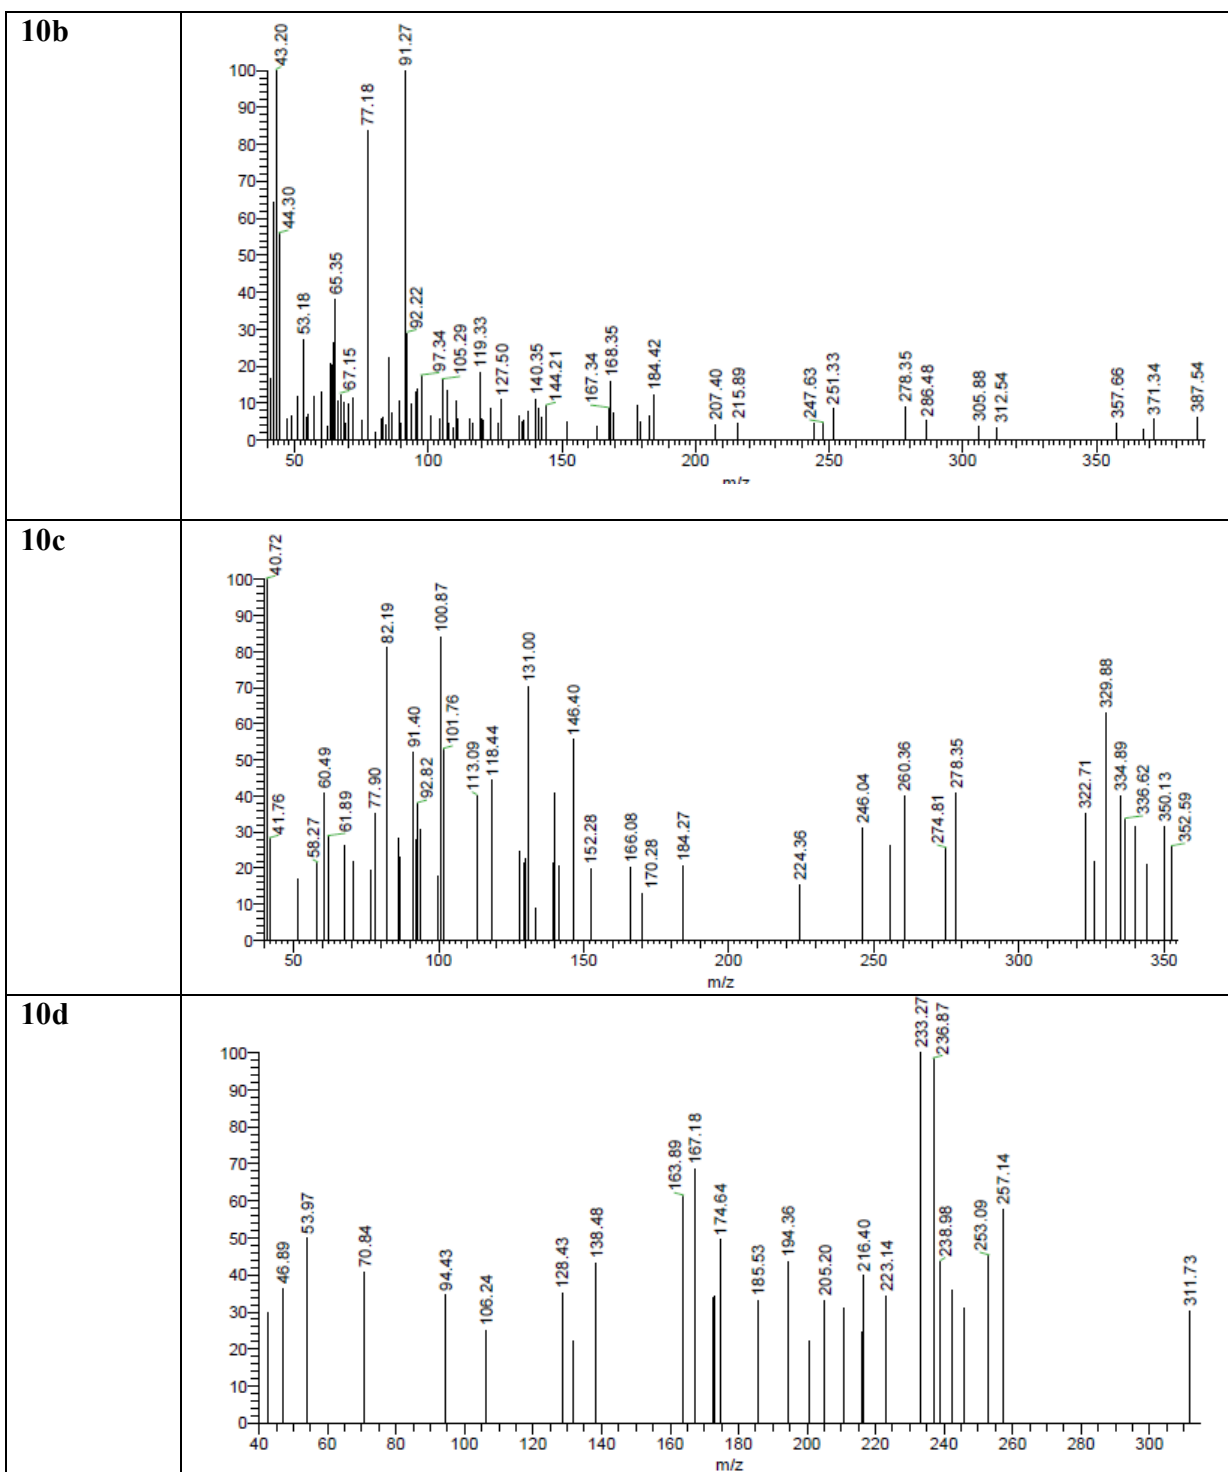

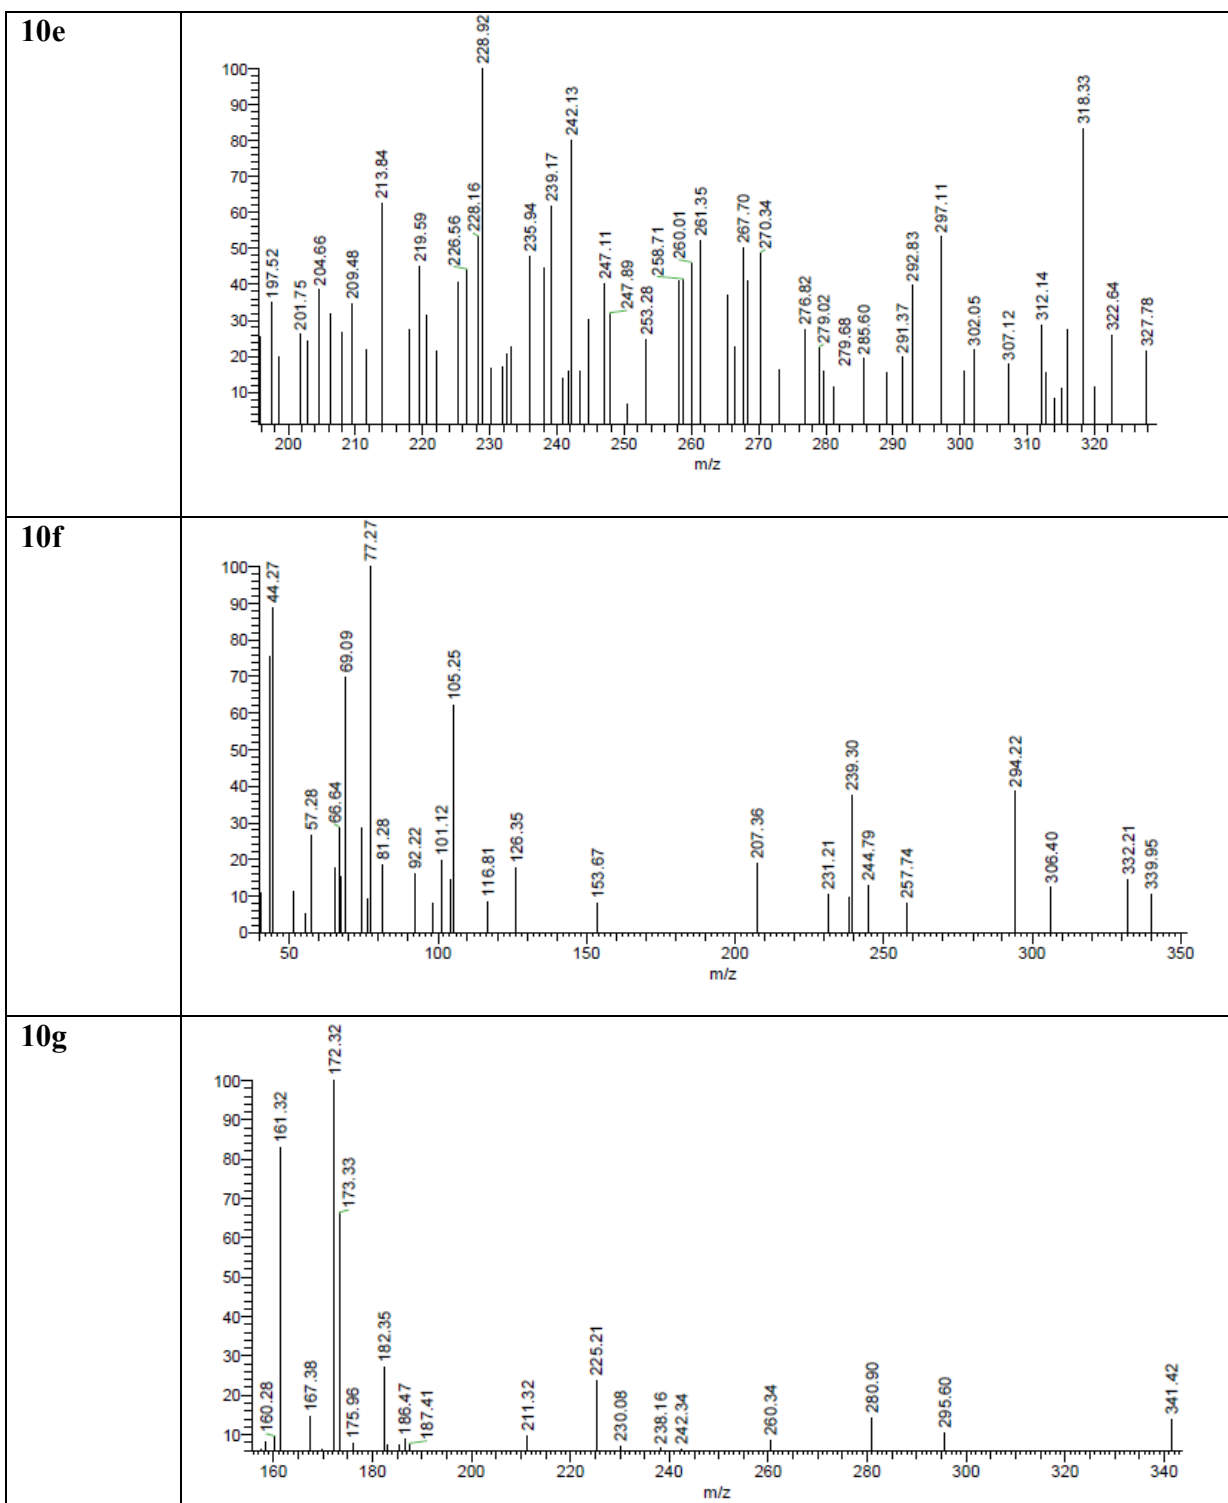

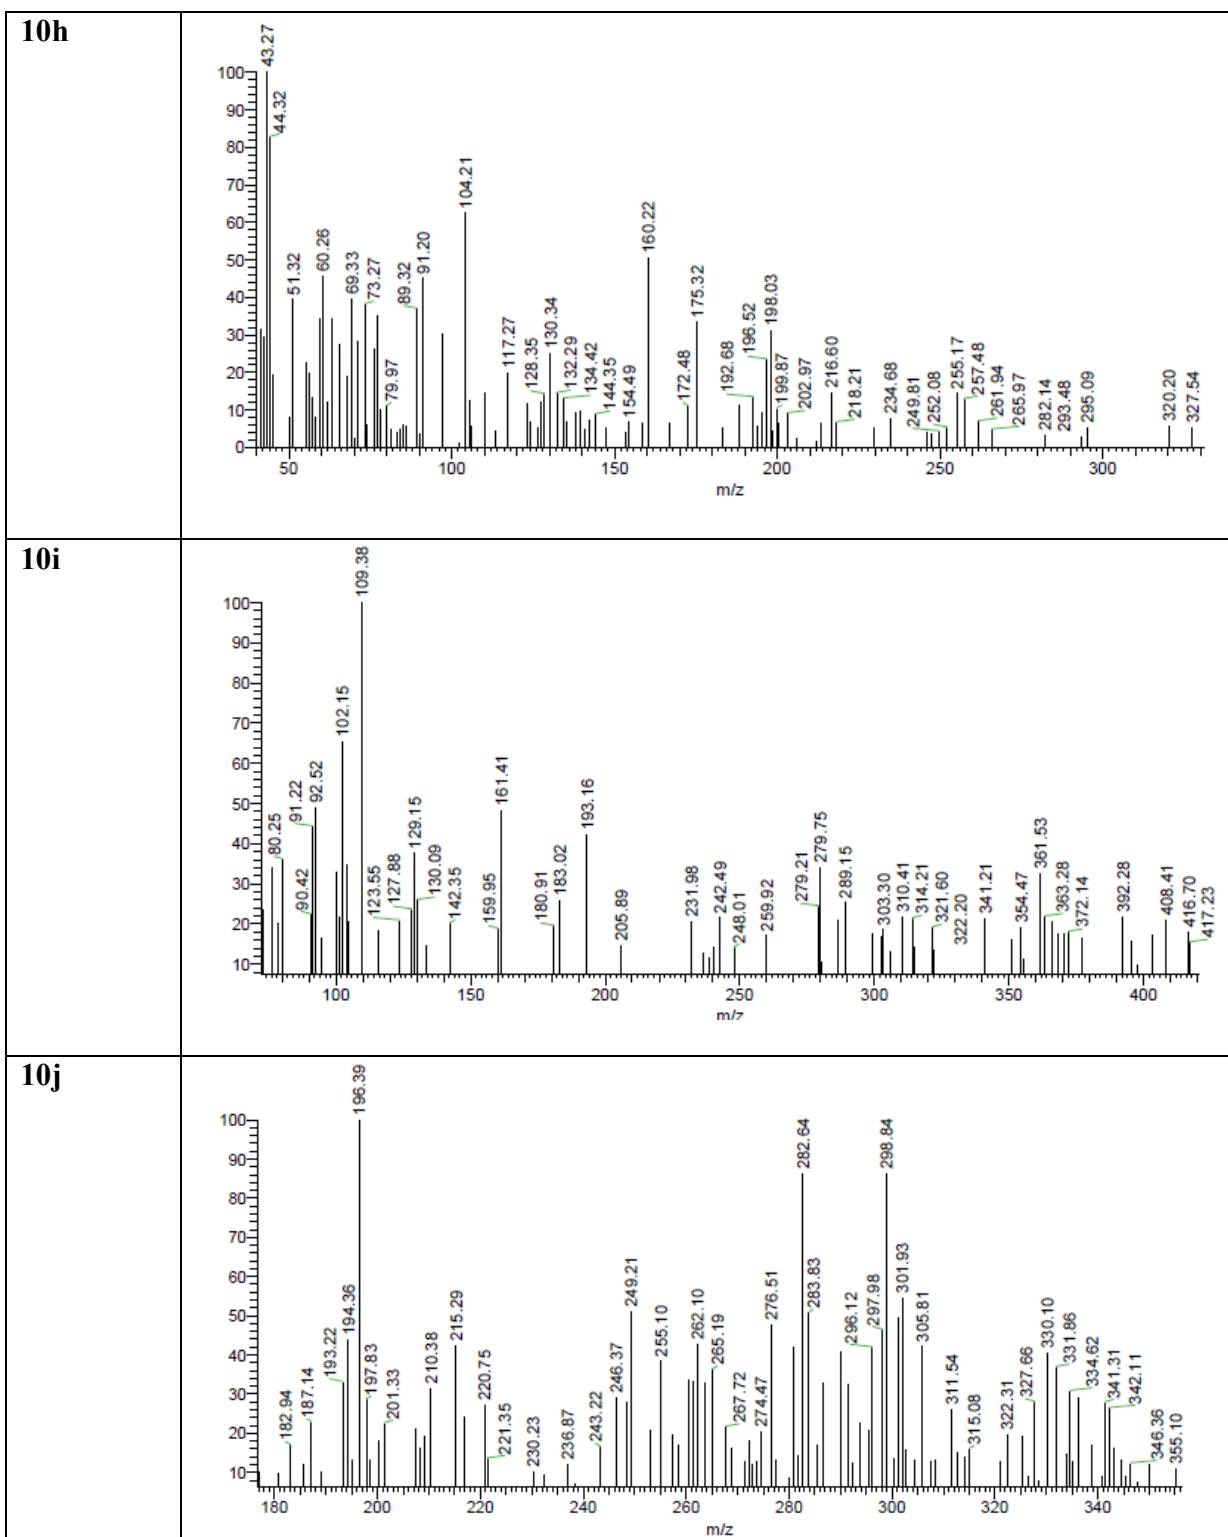

10k

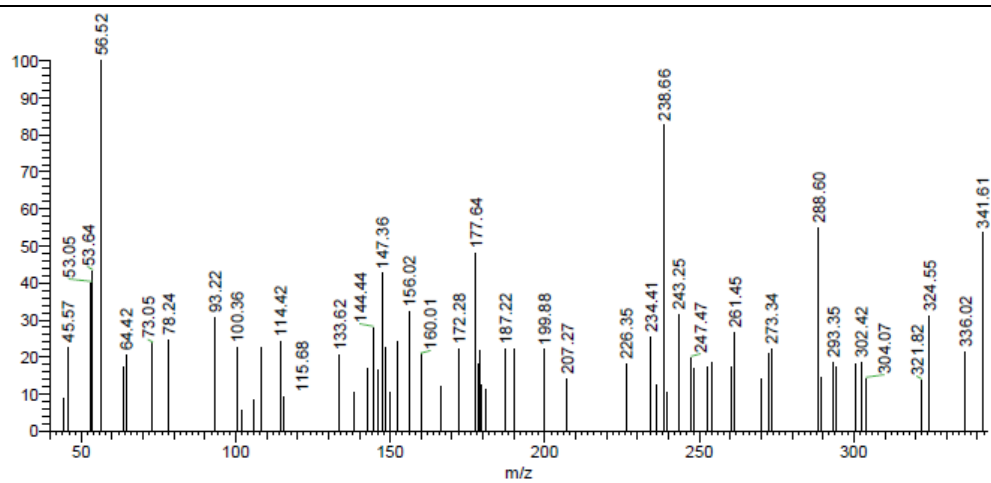

10l

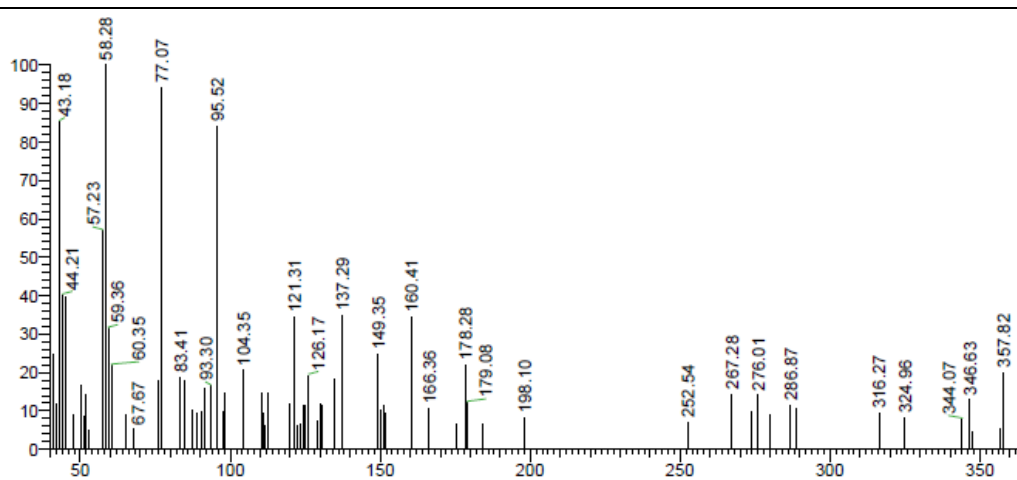

Supplement: s1 [file s1]
